# Supplementary material for: Plasticity in Classical Hodgkin Composite Lymphomas: A Systematic Review
Source: MDPI journal article supplement (doi:10.3390/cancers14225695), 2022-11-19
Supplement: s1 [file s1]

## Supplementary Materials

**Supplementary Text S1:** classification of treatments.

**Supplementary Figure S1:** flow diagram.

**Supplementary Table S1:** PRISMA 2020 checklist.

**Supplementary Table S2:** clinical and laboratory data of cHL/follicular composite lymphomas.

**Supplementary Table S3:** histopathological and molecular data of cHL/follicular composite lymphomas.

**Supplementary Table S4:** clinical and laboratory data data of cHL/mantle-cell composite lymphomas.

**Supplementary Table S5:** histopathological and molecular data of cHL/mantle-cell composite lymphomas).

**Supplementary Table S6:** clinical and laboratory data of cHL/marginal zone composite lymphomas.

**Supplementary Table S7:** histopathological and molecular data of cHL/marginal zone composite lymphomas.

**Supplementary Table S8:** clinical and laboratory data of cHL/diffuse large B-cells composite lymphomas.

**Supplementary Table S9:** histopathological and molecular data of cHL/diffuse large B-cells composite lymphomas.

**Supplementary Table S10:** clinical and laboratory data of cHL/NLPHL composite lymphomas.

**Supplementary Table S11:** histopathological and molecular data of cHL/NLPHL composite lymphomas.

**Supplementary Table S12:** clinical and laboratory data of cHL/T-cell composite lymphomas.

**Supplementary Table S13:** histopathological and molecular data of cHL/T-cell composite lymphomas.

## **Supplementary Text S1: classification of treatments.**

For treatments, since the chemotherapy used were different between studies/case reports, lymphoma treatments were classified in five groups as follows: i) cHL-like chemotherapy; ii) B-cell lymphoma-like chemotherapy (small B-cell and diffuse large B-cell (DLBCL) lymphoma); iii) T-cell lymphoma-like chemotherapy; and iv) composite lymphoma-like chemotherapy (combination of cHL-like chemotherapy and another molecule or chemotherapy to treat both contingents).

### **cHL-like chemotherapy**

ABVD +/- RT (doxorubicin, vinblastine, bleomycin, dacarbazine +/- radiotherapy), ChIVPP (chlorambucil, vinblastine, procarbazine, prednisolone), CVPP (cyclophosphamide, vinblastine, procarbazine, prednisolone), COPP (cyclophosphamide, vincristine, procarbazine, prednisolone), vinblastine (VELBE), IVOx (ifosfamide, etoposide, oxaliplatin), cisplatin + prednisone + BCNU (cyclophosphamide, carmustine), BEACOPP (bleomycin, etoposide, doxorubicin, cyclophosphamide, vincristine, procarbazine, prednisone), BV-ICE (brentuximab, vedotin, ifosfamide, carboplatin, etoposide) were considered as cHL-like chemotherapy.

### **B-cell lymphoma-like chemotherapy**

R-CHOP +/- RT (rituximab, doxorubicin, methylprednisolone, cyclophosphamide, vincristine +/- radiotherapy) or CHOP +/- RT, EPOCH (etoposide, vincristine, adriamycin, cyclophosphamide, prednisone), bendamustine were considered as small B-cell lymphoma-like chemotherapy.

R-CHOP, CHOP, R-DHAOx (rituximab dexamethasone cytarabine oxaliplatin), R-ACVBP (rituximab, doxorubicin, cyclophosphamide, vindesine, bleomycin, prednisone), R-COPADM (rituximab, cyclophosphamide, vincristine, prednisone, adriamycin, high-dose methotrexate) + CYM (cytarabine, methotrexate, prednisone), MACOP-B (methotrexate, doxorubicin, cyclophosphamide, vincristine, prednisone, bleomycin), R-EPOCH, ProMACE-MOPP (prednisone, methotrexate, doxorubicin, cyclophosphamide, etoposide, and mechlorethamine, vincristine, procarbazine, prednisone), ProMACE CytaBOM (cyclophosphamide, doxorubicin, etoposide and cytozar, bleomycin, vincristine, methotrexate prednisone), were classified as DLBCL-like chemotherapy.

### **T-cell lymphoma-like chemotherapy**

CHO(E)P and GDP (Gemcitabine, Dexamethasone, Cisplatin) were considered as T-cell lymphoma-like chemotherapy.

### **Composite lymphoma-like chemotherapy**

The combination of chemotherapies as R-ABVD (rituximab, doxorubicin, vinblastine, bleomycin, dacarbazine), C-MOPP (cyclophosphamide, vincristine, procarbazine, prednisone) + ABVD or MOPP (mechlorethamine, vincristine, procarbazine, prednisone) + ABV, R-BEACOPP, ABVD or CHOP combined with R-ICE (rituximab, ifosfamide, carboplatine, etoposide), ICE + LEED (L-PAM, etoposide, cyclophosphamide, and dexamethazone), ABDV + CHO(E)P or ABDV + chidamide, and RT + R-CODOX-M/IVAC (rituximab, cyclophosphamide, doxorubicin, vincristine, methotrexate/ifosfamide, etoposide, high dose cytarabine), R-DHAOX (rituximab, dexamethasone, high-dose cytarabine, oxaliplatin) were considered as composite lymphoma-like chemotherapy.

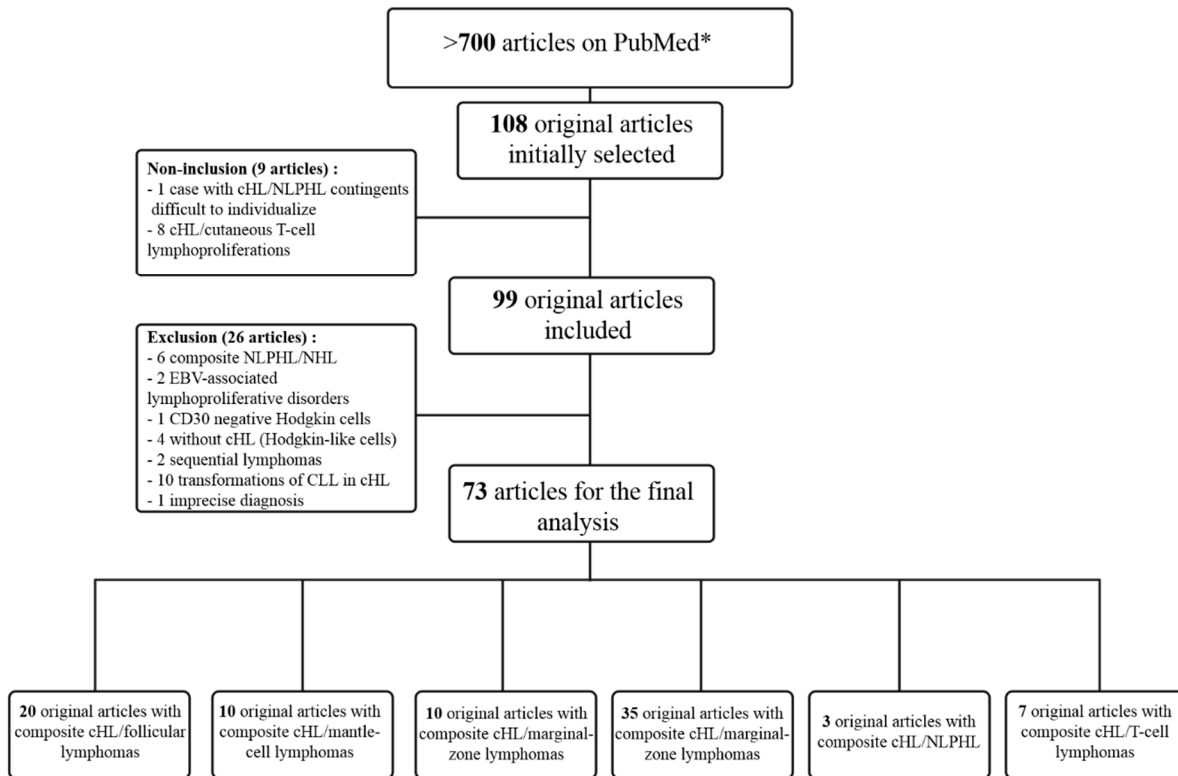

**Supplementary Figure S1:** flow diagram for original article inclusion/exclusion.

\*Among the >700 articles found on PubMed using the keywords “composite lymphoma(s)”, “synchronous lymphoma(s)”, “composite AND Hodgkin”, and “synchronous AND Hodgkin”, 108 were initially selected (all composite/synchronous lymphoma case reports or series). However, nine original articles were not included because they did not meet inclusion criteria (see Methods). Among the 99 original articles included, 26 were excluded because they met exclusion criteria (see Methods). As a result, 73 original articles were used for the final analysis. However, many articles reported different types of composite lymphomas, explaining that the sum of all articles is not 73.

CLL: Chronic lymphocytic leukemia; cHL: Classical Hodgkin lymphoma; EBV: Epstein-Barr virus; NHL: Non-Hodgkin lymphoma; NLPHL: Nodular lymphocyte-predominant Hodgkin lymphoma. This figure was created using BioRender (Toronto, Canada).

**Supplementary Table S1: PRISMA 2020 checklist.**

| Section and Topic             | Item # | Checklist item                                                                                                                                                                                                                                                                                       | Location where item is reported |
|-------------------------------|--------|------------------------------------------------------------------------------------------------------------------------------------------------------------------------------------------------------------------------------------------------------------------------------------------------------|---------------------------------|
| <b>TITLE</b>                  |        |                                                                                                                                                                                                                                                                                                      |                                 |
| Title                         | 1      | Identify the report as a systematic review.                                                                                                                                                                                                                                                          | p. 1                            |
| <b>ABSTRACT</b>               |        |                                                                                                                                                                                                                                                                                                      |                                 |
| Abstract                      | 2      | See the PRISMA 2020 for Abstracts checklist.                                                                                                                                                                                                                                                         | p. 4                            |
| <b>INTRODUCTION</b>           |        |                                                                                                                                                                                                                                                                                                      |                                 |
| Rationale                     | 3      | Describe the rationale for the review in the context of existing knowledge.                                                                                                                                                                                                                          | p. 5-6                          |
| Objectives                    | 4      | Provide an explicit statement of the objective(s) or question(s) the review addresses.                                                                                                                                                                                                               | p. 5-6                          |
| <b>METHODS</b>                |        |                                                                                                                                                                                                                                                                                                      |                                 |
| Eligibility criteria          | 5      | Specify the inclusion and exclusion criteria for the review and how studies were grouped for the syntheses.                                                                                                                                                                                          | p. 7                            |
| Information sources           | 6      | Specify all databases, registers, websites, organisations, reference lists and other sources searched or consulted to identify studies. Specify the date when each source was last searched or consulted.                                                                                            | p. 7                            |
| Search strategy               | 7      | Present the full search strategies for all databases, registers and websites, including any filters and limits used.                                                                                                                                                                                 | p. 7                            |
| Selection process             | 8      | Specify the methods used to decide whether a study met the inclusion criteria of the review, including how many reviewers screened each record and each report retrieved, whether they worked independently, and if applicable, details of automation tools used in the process.                     | p. 7                            |
| Data collection process       | 9      | Specify the methods used to collect data from reports, including how many reviewers collected data from each report, whether they worked independently, any processes for obtaining or confirming data from study investigators, and if applicable, details of automation tools used in the process. | p. 7                            |
| Data items                    | 10a    | List and define all outcomes for which data were sought. Specify whether all results that were compatible with each outcome domain in each study were sought (e.g. for all measures, time points, analyses), and if not, the methods used to decide which results to collect.                        | p. 7, Supp. Material            |
|                               | 10b    | List and define all other variables for which data were sought (e.g. participant and intervention characteristics, funding sources). Describe any assumptions made about any missing or unclear information.                                                                                         | p. 7, Supp. Material            |
| Study risk of bias assessment | 11     | Specify the methods used to assess risk of bias in the included studies, including details of the tool(s) used, how many reviewers assessed each study and whether they worked independently, and if applicable, details of automation tools used in the process.                                    | p. 7                            |
| Effect measures               | 12     | Specify for each outcome the effect measure(s) (e.g. risk ratio, mean difference) used in the synthesis or presentation of results.                                                                                                                                                                  | p. 8                            |
| Synthesis methods             | 13a    | Describe the processes used to decide which studies were eligible for each synthesis (e.g. tabulating the study intervention characteristics and comparing against the planned groups for each synthesis (item #5)).                                                                                 | p. 7                            |
|                               | 13b    | Describe any methods required to prepare the data for presentation or synthesis, such as handling of missing summary statistics, or data conversions.                                                                                                                                                | p. 8                            |
|                               | 13c    | Describe any methods used to tabulate or visually display results of individual studies and syntheses.                                                                                                                                                                                               | p. 8                            |

|                               |     |                                                                                                                                                                                                                                                                                      |            |
|-------------------------------|-----|--------------------------------------------------------------------------------------------------------------------------------------------------------------------------------------------------------------------------------------------------------------------------------------|------------|
| Reporting bias assessment     | 14  | Describe any methods used to assess risk of bias due to missing results in a synthesis (arising from reporting biases).                                                                                                                                                              | p. 8       |
| Certainty assessment          | 15  | Describe any methods used to assess certainty (or confidence) in the body of evidence for an outcome.                                                                                                                                                                                | NA         |
| <b>RESULTS</b>                |     |                                                                                                                                                                                                                                                                                      |            |
| Study selection               | 16a | Describe the results of the search and selection process, from the number of records identified in the search to the number of studies included in the review, ideally using a flow diagram.                                                                                         | p. 9       |
|                               | 16b | Cite studies that might appear to meet the inclusion criteria, but which were excluded, and explain why they were excluded.                                                                                                                                                          | p. 9       |
| Study characteristics         | 17  | Cite each included study and present its characteristics.                                                                                                                                                                                                                            | p. 9 -17   |
| Risk of bias in studies       | 18  | Present assessments of risk of bias for each included study.                                                                                                                                                                                                                         | NA         |
| Results of individual studies | 19  | For all outcomes, present, for each study: (a) summary statistics for each group (where appropriate) and (b) an effect estimate and its precision (e.g. confidence/credible interval), ideally using structured tables or plots.                                                     | Tables 1-3 |
| Results of syntheses          | 20a | For each synthesis, briefly summarise the characteristics and risk of bias among contributing studies.                                                                                                                                                                               | p. 10-17   |
|                               | 20b | Present results of all statistical syntheses conducted. If meta-analysis was done, present for each the summary estimate and its precision (e.g. confidence/credible interval) and measures of statistical heterogeneity. If comparing groups, describe the direction of the effect. | Table 1-3  |
|                               | 20c | Present results of all investigations of possible causes of heterogeneity among study results.                                                                                                                                                                                       | NA         |
|                               | 20d | Present results of all sensitivity analyses conducted to assess the robustness of the synthesized results.                                                                                                                                                                           | NA         |
| Reporting biases              | 21  | Present assessments of risk of bias due to missing results (arising from reporting biases) for each synthesis assessed.                                                                                                                                                              | NA         |
| Certainty of evidence         | 22  | Present assessments of certainty (or confidence) in the body of evidence for each outcome assessed.                                                                                                                                                                                  | NA         |
| <b>DISCUSSION</b>             |     |                                                                                                                                                                                                                                                                                      |            |
| Discussion                    | 23a | Provide a general interpretation of the results in the context of other evidence.                                                                                                                                                                                                    | p. 18-19   |
|                               | 23b | Discuss any limitations of the evidence included in the review.                                                                                                                                                                                                                      | p. 24      |
|                               | 23c | Discuss any limitations of the review processes used.                                                                                                                                                                                                                                | p. 24      |
|                               | 23d | Discuss implications of the results for practice, policy, and future research.                                                                                                                                                                                                       | p. 24-25   |

| OTHER INFORMATION                              |     |                                                                                                                                                                                                                                            |                |
|------------------------------------------------|-----|--------------------------------------------------------------------------------------------------------------------------------------------------------------------------------------------------------------------------------------------|----------------|
| Registration and protocol                      | 24a | Provide registration information for the review, including register name and registration number, or state that the review was not registered.                                                                                             | p. 8           |
|                                                | 24b | Indicate where the review protocol can be accessed, or state that a protocol was not prepared.                                                                                                                                             | NA             |
|                                                | 24c | Describe and explain any amendments to information provided at registration or in the protocol.                                                                                                                                            | NA             |
| Support                                        | 25  | Describe sources of financial or non-financial support for the review, and the role of the funders or sponsors in the review.                                                                                                              | p. 28          |
| Competing interests                            | 26  | Declare any competing interests of review authors.                                                                                                                                                                                         | p. 28          |
| Availability of data, code and other materials | 27  | Report which of the following are publicly available and where they can be found: template data collection forms; data extracted from included studies; data used for all analyses; analytic code; any other materials used in the review. | Supp. Material |

From: Page MJ, McKenzie JE, Bossuyt PM, Boutron I, Hoffmann TC, Mulrow CD, et al. The PRISMA 2020 statement: an updated guideline for reporting systematic reviews. BMJ 2021;372:n71. doi: 10.1136/bmj.n71

For more information, visit: <http://www.prisma-statement.org/>

NA: Not assessed.



Supplementary Table S2: clinical and laboratory data of cHL/follicular composite lymphomas.

| References                                   | Age (years) | Sex | History of lymphoma                             | Location              | Tumor size (cm) | B symptoms | Ann Arbor stage | Other symptoms                           | Laboratory data     | Extension assessment                    | Treatment       | Outcomes                     | Follow-up duration (months) | Time of relapse / DOD (months) |
|----------------------------------------------|-------------|-----|-------------------------------------------------|-----------------------|-----------------|------------|-----------------|------------------------------------------|---------------------|-----------------------------------------|-----------------|------------------------------|-----------------------------|--------------------------------|
| Thirumala <i>et al.</i> , 2000 [15]          | 73          | M   | FL (13 years ago, treated by radiation therapy) | Left inguinal area LN | 4.5             | Yes        | I B             | Sore throat, and 3-day duration malaise. | NA                  | CT-scan: no adenopathy nor organomegaly | NA              | NA                           | NA                          | NA                             |
| Urano <i>et al.</i> , 2004 [54]              | 58          | M   |                                                 | Right parotid gland   | 2               | No         | II A            | Right parotid swelling since 3 months    | NA                  | CT-scan: no abnormality                 | CHOP            | Complete remission           | NA                          | NA                             |
| Vasudevan <i>et al.</i> , 2017 (case 1) [55] | 48          | F   | No                                              | Cervical LN           | NA              | Yes        | IV B            | NA                                       | NA                  | NA                                      | R-CHOP + RT     | Loss to follow-up            | NA                          | NA                             |
| Vasudevan <i>et al.</i> , 2017 (case 2) [55] | 59          | M   | No                                              | Cervical LN           | NA              | No         | I A             | NA                                       | NA                  | NA                                      | ABVD + RT       | Asymptomatic since 1 year    | 12                          | NA                             |
| Vasudevan <i>et al.</i> , 2017 (case 3) [55] | 53          | M   | No                                              | Cervical LN           | NA              | No         | I A             | NA                                       | NA                  | NA                                      | R-CHOP + RT     | Asymptomatic since 11 months | 11                          | NA                             |
| Vasudevan <i>et al.</i> , 2017 (case4) [55]  | 44          | M   | No                                              | Inguinal LN           | NA              | Yes        | II B            | NA                                       | NA                  | NA                                      | R-CHOP          | Loss to follow-up            | NA                          | NA                             |
| Vasudevan <i>et al.</i> , 2017 (case 5) [55] | 72          | M   | No                                              | Perigastric LN        | NA              | Yes        | IV B            | NA                                       | NA                  | NA                                      | No treatment    | Loss to follow-up            | NA                          | NA                             |
| Huang <i>et al.</i> , 2022 (case 1) [56]     | 75          | F   | NA                                              | Inguinal LN           | NA              | NA         | NA              | NA                                       | NA                  | NA                                      | NA              | DOD                          | 3                           | 3                              |
| Huang <i>et al.</i> , 2022 (case 2) [56]     | 64          | M   | NA                                              | Splenic hilar LN      | NA              | Yes        | IV B            | NA                                       | LDH in normal range | BM +: FL, 40%                           | NA              | Alive                        | 57                          | NA                             |
| Huang <i>et al.</i> , 2022 (case 3) [56]     | 57          | F   | NA                                              | Inguinal LN           | NA              | No         | NA              | NA                                       | LDH in normal range | NA                                      | R-ABVD + ASCT   | Alive but relapse            | 17                          | NA                             |
| Huang <i>et al.</i> , 2022 (case 4) [56]     | 51          | F   | NA                                              | Mesenteric LN         | NA              | Yes        | IV B            | NA                                       | LDH in normal range | BM+: FL, 1%                             | ABVD            | Alive                        | 9                           | NA                             |
| Huang <i>et al.</i> , 2022 (case5) [56]      | 82          | F   | NA                                              | Axillary LN           | NA              | NA         | NA              | NA                                       | NA                  | BM-                                     | NA              | NA                           | NA                          | NA                             |
| Huang <i>et al.</i> , 2022 (case 6) [56]     | 58          | F   | NA                                              | Paratracheal LN       | NA              | NA         | NA              | NA                                       | NA                  | NA                                      | NA              | NA                           | NA                          | NA                             |
| Huang <i>et al.</i> , 2022 (case 7) [56]     | 46          | M   | NA                                              | Inguinal LN           | NA              | Yes        | IV B            | NA                                       | LDH in normal range | BM+: FL, 5%                             | MOPP/ABV + ASCT | Alive                        | 82                          | NA                             |
| Huang <i>et al.</i> , 2022 (case 8) [56]     | 50          | M   | NA                                              | Supraclavicular LN    | NA              | No         | IV A            | NA                                       | LDH in normal range | BM+: FL, 5%                             | ChIVPP/ABV+ASCT | Alive                        | 116                         | NA                             |
| Huang <i>et al.</i> , 2022 (case 9) [56]     | 56          | M   | NA                                              | Peritracheal LN       | NA              | NA         | NA              | NA                                       | NA                  | NA                                      | NA              | NA                           | NA                          | NA                             |
| Huang <i>et al.</i> , 2022 (case 10) [56]    | 68          | F   | NA                                              | Cervical LN           | NA              | NA         | NA              | NA                                       | LDH in normal range | BM-                                     | NA              | DOD                          | 63                          | 63                             |
| Huang <i>et al.</i> , 2022 (case 11) [56]    | 43          | F   | NA                                              | Cervical LN           | NA              | NA         | IV              | NA                                       | LDH in normal range | BM+: FL, 5%                             | R-CHOP          | DOD                          | 10                          | 10                             |

|                                                   |    |   |    |                                                                 |    |     |       |                                 |                                                                                 |                                                                                   |                                                 |                              |     |    |
|---------------------------------------------------|----|---|----|-----------------------------------------------------------------|----|-----|-------|---------------------------------|---------------------------------------------------------------------------------|-----------------------------------------------------------------------------------|-------------------------------------------------|------------------------------|-----|----|
| Huang <i>et al.</i> ,<br>2022 (case 12)<br>[56]   | 60 | M | NA | Supraclavicular<br>LN                                           | NA | NA  | NA    | NA                              | NA                                                                              | NA                                                                                | NA                                              | NA                           | NA  | NA |
| Huang <i>et al.</i> ,<br>2022 (case 13)<br>[56]   | 66 | M | NA | Axillary LN                                                     | NA | Yes | IV B  | NA                              | LDH increase                                                                    | BM-                                                                               | NA                                              | DOD                          | 76  | 76 |
| Huang <i>et al.</i> ,<br>2022 (case 14)<br>[56]   | 57 | M | NA | Inguinal LN                                                     | NA | No  | I A   | NA                              | LDH in normal<br>range                                                          | BM-                                                                               | R-CHOP + RT                                     | Alive, complete<br>remission | 107 | NA |
| Huang <i>et al.</i> ,<br>2022 (case 15)<br>[56]   | 67 | M | NA | Axillary LN                                                     | NA | NA  | IV    | NA                              | NA                                                                              | BM+: FL, 1%                                                                       | R-ABVD x6, RICE x4                              | Alive, partial<br>remission  | 14  | NA |
| Huang <i>et al.</i> ,<br>2022 (case 16)<br>[56]   | 63 | M | NA | Inguinal LN                                                     | NA | NA  | IV    | NA                              | NA                                                                              | BM+: FL, 10%                                                                      | NA                                              | NA                           | NA  | NA |
| Huang <i>et al.</i> ,<br>2022 (case 17)<br>[56]   | 67 | M | NA | Cervical LN                                                     | NA | NA  | NA    | NA                              | NA                                                                              | NA                                                                                | NA                                              | NA                           | NA  | NA |
| Huang <i>et al.</i> ,<br>2022 (case 18)<br>[56]   | 59 | F | NA | Cervical LN                                                     | NA | No  | IV A  | NA                              | LDH in normal<br>range                                                          | BM+: FL, 1%                                                                       | NA                                              | Alive, Partial<br>remission  | 18  | NA |
| Huang <i>et al.</i> ,<br>2022 (case 19)<br>[56]   | 66 | F | NA | Cervical LN                                                     | NA | NA  | II    | NA                              | LDH in normal<br>range                                                          | NA                                                                                | R-CHOP x6, RICE x2<br>+ RT                      | Alive, Partial<br>remission  | 49  | NA |
| Huang <i>et al.</i> ,<br>2022 (case 20)<br>[56]   | 70 | F | NA | Epitrochlear LN                                                 | NA | NA  | I     | NA                              | LDH in normal<br>range                                                          | BM-                                                                               | R-ABVD x4 + RT                                  | Alive, Partial<br>remission  | 10  | NA |
| Huang <i>et al.</i> ,<br>2022 (case 21)<br>[56]   | 50 | M | NA | Mesenteric LN                                                   | NA | NA  | NA    | NA                              | NA                                                                              | NA                                                                                | NA                                              | NA                           | NA  | NA |
| Huang <i>et al.</i> ,<br>2022 (case 22)<br>[56]   | 63 | F | NA | Axillary LN                                                     | NA | NA  | NA    | NA                              | NA                                                                              | NA                                                                                | NA                                              | NA                           | NA  | NA |
| Trecourt <i>et al.</i> ,<br>2022 (case 1)<br>[10] | 81 | F | No | Axillary,<br>cervical, sub-<br>carina, porto-<br>cava, iliac LN | 1  | No  | III A | No                              | LDH in normal<br>range,<br>β2microglobulin<br>increase,<br>hypogammaglobulin    | PET-scan: Axillary,<br>cervical, sub-carina, porto-<br>cava, iliac LN             | VELBE                                           | Alive, Partial<br>remission  | 6   | NA |
| Trecourt <i>et al.</i> ,<br>2022 (case 4)<br>[10] | 76 | M | No | Parotid gland                                                   | 3  | No  | I A   | Suspicion of acute<br>parotitis | LDH increase,<br>β2microglobulin in<br>normal range, blood<br>cell count normal | CT-scan: no other lesion                                                          | No treatment                                    | NA                           | 24  | NA |
| Trecourt <i>et al.</i> ,<br>2022 (case 5)<br>[10] | 62 | M | No | Mesenteric<br>mass, splenic<br>hilar LN                         | 14 | Yes | II B  | Dry cough                       | Anemia, CRP<br>increase                                                         | PET-scan: mesenteric mass<br>with splenic hilar LN;<br>BM-                        | R-ABVD x6                                       | NA                           | NA  | NA |
| Trecourt <i>et al.</i> ,<br>2022 (case 6)<br>[10] | 67 | M | No | Inguinal LN                                                     | 7  | No  | II A  | No                              | LDH,<br>β2microglobulin ,<br>and albumin in<br>normal range                     | CT-scan: iliac and inguinal<br>LN                                                 | R-CHOP, then<br>maintenance treatment<br>with R | Complete remission           | 20  | NA |
| Trecourt <i>et al.</i> ,<br>2022 (case 7)<br>[10] | 57 | F | No | Mesenteric<br>mass                                              | 9  | Yes | IV B  | No                              | Anemia, LDH and<br>β2microglobulin<br>increase                                  | CT-scan: mesenteric LN;<br>PET-scan: sub- and supra-<br>diaphragmatic lymph nodes | R-ABVD x6                                       | Complete remission           | 12  | NA |
| Trecourt <i>et al.</i> ,<br>2022 (case 8)<br>[10] | 79 | M | No | Lumbo-aortic<br>LN                                              | NA | Yes | IV B  | Hives                           | NA                                                                              | CT-scan: mediastinal,<br>retoperitoneal and<br>mesenteric LN;<br>BM+: FL          | ABVD x8                                         | Complete remission           | 84  | NA |

|                                              |    |   |                                      |                                                                             |     |     |       |                         |                                                                  |                                                           |                                                                                          |                                                                                                      |      |      |
|----------------------------------------------|----|---|--------------------------------------|-----------------------------------------------------------------------------|-----|-----|-------|-------------------------|------------------------------------------------------------------|-----------------------------------------------------------|------------------------------------------------------------------------------------------|------------------------------------------------------------------------------------------------------|------|------|
| Trecourt <i>et al.</i> , 2022 (case 9) [10]  | 79 | M | No                                   | Inguinal, axillary, lumbo-aortic, retroperitoneal LN                        | 5,3 | Yes | III B | NA                      | Anemia, $\beta$ 2microglobulin increase, LDH in normal range     | NA                                                        | R-CHOP x6, then MOPP for relapse                                                         | Complete remission but relapse after 4 months, and then complete remission                           | 95   | 4    |
| Trecourt <i>et al.</i> , 2022 (case 11) [10] | 81 | M | No                                   | supraclavicular LN                                                          | NA  | No  | II A  | No                      | NA                                                               | CT-scan : retroperitoneal, mesenteric, supraclavicular LN | ABVD x4 + RT                                                                             | Complete remission, but DOD after 9 years (relapse on FL)                                            | 108  | 108  |
| Trecourt <i>et al.</i> , 2022 (case 22) [10] | 58 | M | No                                   | Cutaneous lesions and deltoid, mediastinal, supraclavicular and cervical LN | 7   | No  | IV A  | Pruritus                | LDH, $\beta$ 2microglobulin, CRP, and hemoglobin in normal range | NA                                                        | R-ABVD x6, for the relapse 8 months later: R-CVP but DOD 10 months after diagnosis of FL | Complete remission during 8 months, and relapse (unspecified)                                        | 12   | 8    |
| Trecourt <i>et al.</i> , 2022 (case 3) [10]  | 81 | M | FL                                   | Axillary LN Parotid gland                                                   | NA  | No  | IV A  | No                      | LDH and CRP in normal range                                      | NA                                                        | R-CHOP x8                                                                                | Complete remission                                                                                   | 60   | NA   |
| Trecourt <i>et al.</i> , 2022 (case 10) [10] | 58 | M | FL                                   | Retroperitoneal LN, cutaneous location                                      | NA  | NA  | NA    | NA                      | NA                                                               | CT-scan: retroperitoneal LN and a sub-cutaneous lesion    | R-DHAOX x6, and then MINE-R                                                              | Partial remission after first therapy, relapse 11 months later and DOD 15 months after the diagnosis | 15   | 11   |
| Trecourt <i>et al.</i> , 2022 (case 12) [10] | 56 | M | cHL (8 years earlier)                | Mediastinum                                                                 | NA  | NA  | NA    | NA                      | NA                                                               | NA                                                        | Brentuximab-Bendamustine, gemcitabine and R-IVA x3                                       | Complete remission and relapse 14 months later and DOD 17 months after the relapse                   | 17   | 14   |
| Maeshima <i>et al.</i> , 2015 (case 1) [3]   | 40 | F | No                                   | Unspecified (LN)                                                            | NA  | NA  | I     | NA                      | NA                                                               | NA                                                        | C-MOPP, ABVD + RT                                                                        | Alive, complete remission                                                                            | 171  | NA   |
| Maeshima <i>et al.</i> , 2015 (case 2) [3]   | 50 | M | No                                   | Unspecified (LN)                                                            | NA  | NA  | IV    | NA                      | NA                                                               | BM+: FL                                                   | R-ABCD                                                                                   | Alive, complete remission                                                                            | 23   | NA   |
| Maeshima <i>et al.</i> , 2015 (case 3) [3]   | 50 | M | No                                   | Unspecified (LN) and duodenum                                               | NA  | NA  | III   | NA                      | NA                                                               | NA                                                        | R-ABCD                                                                                   | Alive, complete remission, but relapse on FL at 31 months                                            | 31   | 31   |
| Maeshima <i>et al.</i> , 2015 (case 4) [3]   | 61 | M | No                                   | Unspecified (LN)                                                            | NA  | NA  | III   | NA                      | NA                                                               | NA                                                        | ABVD                                                                                     | Alive, complete remission, but relapse on FL at 59 months                                            | 59   | 59   |
| Maeshima <i>et al.</i> , 2015 (case 5) [3]   | 45 | F | No                                   | Unspecified (LN)                                                            | NA  | NA  | IV    | NA                      | NA                                                               | BM+: cHL                                                  | R-CHOP, then treatment of the progressive disease using ABVD                             | DOD (relapse on cHL)                                                                                 | 8    | 8    |
| Küppers <i>et al.</i> , 2001 [12]            | 43 | M | No                                   | Splenic hilar LN                                                            | NA  | NA  | IV    | Hemophagocytic syndrome | NA                                                               | BM+ (autopsy): FL                                         | No treatment                                                                             | DOD (hemophagocytic syndrome)                                                                        | 0.75 | 0.75 |
| Gonzalez <i>et al.</i> , 1991 (case 2) [14]  | 43 | M | DLBCL 4 years ago and FL 2 years ago | Inguinal LN                                                                 | NA  | No  | NA    | NA                      | NA                                                               | BM-                                                       | Multiagent chemotherapy + ASCT                                                           | DOD 26 months after diagnosis of CL                                                                  | 26   | 26   |
| Gonzalez <i>et al.</i> , 1991 (case 4) [14]  | 62 | F | No                                   | Inguinal LN                                                                 | NA  | No  | I     | NA                      | NA                                                               | BM-                                                       | RT                                                                                       | Alive, complete remission                                                                            | 27   | NA   |

|                                                |    |   |                  |                                         |    |     |      |             |                                                              |                                                                                                        |                                                             |                                                              |    |    |
|------------------------------------------------|----|---|------------------|-----------------------------------------|----|-----|------|-------------|--------------------------------------------------------------|--------------------------------------------------------------------------------------------------------|-------------------------------------------------------------|--------------------------------------------------------------|----|----|
| Gonzalez <i>et al.</i> , 1991 (case 8) [14]    | 48 | M | FL, 12 years ago | Cervical and inguinal LN                | NA | Yes | NA   | NA          | NA                                                           | BM-                                                                                                    | RT+ nitrogen mustard; vincristine; prednisone; procarbazine | Relapse 18 months later and DOD at 55 months                 | 55 | 18 |
| Bräuminger <i>et al.</i> , 1999 (case 1) [11]  | 75 | F | No               | Retroperitoneal LN                      | NA | Yes | IV B | NA          | NA                                                           | BM+: FL; Liver involvement (FL)                                                                        | CVPP x 8                                                    | Alive, but relapse 18 months later (not confirmed by biopsy) | 18 | 18 |
| Linck <i>et al.</i> , 2005 [57]                | 38 | M | No               | Inguinal and cervical LN                | NA | No  | IV A | NA          | Thrombopenia, $\beta$ 2microglobulin increase, low IgG level | CT-scan: multiple cervical, mediastinal, mesenterial and inguinal LN and splenomegaly; BM+: FL, 40-60% | Polychemotherapy (BEACOPP) + R                              | Alive, complete remission                                    | 28 | NA |
| Jaffe <i>et al.</i> , 1992 (case 2) [58]       | 38 | M | No               | Cervical LN                             | NA | NA  | NA   | NA          | NA                                                           | NA                                                                                                     | NA                                                          | NA                                                           | NA | NA |
| Jaffe <i>et al.</i> , 1992 (case 5) [58]       | 84 | F | No               | Cervical LN                             | NA | NA  | NA   | NA          | NA                                                           | NA                                                                                                     | NA                                                          | NA                                                           | NA | NA |
| Jaffe <i>et al.</i> , 1992 (case 13) [58]      | 66 | F | No               | Unspecified (LN)                        | NA | NA  | NA   | NA          | NA                                                           | NA                                                                                                     | NA                                                          | NA                                                           | NA | NA |
| Jaffe <i>et al.</i> , 1992 (case 1) [58]       | 38 | M | FL               | Cervical, inguinal and submandibular LN | NA | NA  | NA   | NA          | NA                                                           | NA                                                                                                     | NA                                                          | NA                                                           | NA | NA |
| Hansmann <i>et al.</i> , 1989 (case 1.3) [59]  | 68 | M | No               | Axillary LN                             | NA | NA  | NA   | NA          | NA                                                           | NA                                                                                                     | NA                                                          | NA                                                           | NA | NA |
| Hansmann <i>et al.</i> , 1989 (case 1.10) [59] | 52 | F | No               | LN (unspecified)                        | NA | NA  | NA   | NA          | NA                                                           | NA                                                                                                     | NA                                                          | NA                                                           | NA | NA |
| Hansmann <i>et al.</i> , 1989 (case 2.1) [59]  | 68 | M | No               | LN (unspecified)                        | NA | NA  | NA   | NA          | NA                                                           | NA                                                                                                     | NA                                                          | NA                                                           | NA | NA |
| Hansmann <i>et al.</i> , 1989 (case 2.2) [59]  | 68 | M | No               | Cervical LN                             | NA | NA  | NA   | NA          | NA                                                           | NA                                                                                                     | NA                                                          | NA                                                           | NA | NA |
| Hansmann <i>et al.</i> , 1989 (case 2.3) [59]  | 37 | F | No               | Supraclavicular LN                      | NA | NA  | NA   | NA          | NA                                                           | NA                                                                                                     | NA                                                          | NA                                                           | NA | NA |
| Hansmann <i>et al.</i> , 1989 (case 2.4) [59]  | 40 | M | No               | Cervical LN                             | NA | NA  | NA   | NA          | NA                                                           | NA                                                                                                     | NA                                                          | NA                                                           | NA | NA |
| Hansmann <i>et al.</i> , 1989 (case 2.5) [59]  | 70 | F | No               | Unspecified (LN)                        | NA | NA  | NA   | NA          | NA                                                           | NA                                                                                                     | NA                                                          | NA                                                           | NA | NA |
| Demurtas <i>et al.</i> , 2011 (case 16) [60]   | 79 | M | No               | Inguinal LN                             | NA | No  | NA   | Weight loss | NA                                                           | NA                                                                                                     | NA                                                          | NA                                                           | NA | NA |
| Yoshida <i>et al.</i> , 2012 (case 1) [61]     | 56 | F | No               | Cervical LN                             | NA | NA  | NA   | NA          | NA                                                           | NA                                                                                                     | NA                                                          | NA                                                           | NA | NA |
| Yoshida <i>et al.</i> , 2012 (case 2) [61]     | 71 | M | No               | Pharynx                                 | NA | NA  | NA   | NA          | NA                                                           | NA                                                                                                     | NA                                                          | NA                                                           | NA | NA |

|                                            |    |    |    |                                                                     |     |     |       |                                                     |                                                                                                    |                                                                                                                                                                                                                                     |                                                                                                                           |                                                                                  |    |    |
|--------------------------------------------|----|----|----|---------------------------------------------------------------------|-----|-----|-------|-----------------------------------------------------|----------------------------------------------------------------------------------------------------|-------------------------------------------------------------------------------------------------------------------------------------------------------------------------------------------------------------------------------------|---------------------------------------------------------------------------------------------------------------------------|----------------------------------------------------------------------------------|----|----|
| Wang <i>et al.</i> , 2016 (case 1) [62]    | 63 | M  | No | Supraclavicular, mediastinal, mesenteric, retroperitoneal LN        | 2,3 | No  | III A | Fatigue                                             | NA                                                                                                 | NA                                                                                                                                                                                                                                  | R-CHOP x8 (partial remission), then after 1.5 years ABVDx6 then brentuximabx2 but partial remission, ICE (non-responsive) | Alive, with cHL refractory to R-CHOP after 18 months                             | 34 | 18 |
| Kim <i>et al.</i> , 2022 [63]              | 40 | M  | No | Neck mass (regions I, II, V), both axillary, and retropancreatic LN | NA  | Yes | IV A  | NA                                                  | NA                                                                                                 | CT-scan/PET-scan: no organomegaly but multiple hypermetabolic LN and mild irregular hypermetabolism of the spleen and along the marrox-space.                                                                                       | ABVD then relapse treated by 6x bendamustine + rituximab                                                                  | Relapse at 6 months on FL (grade 3a)                                             | 6  | 6  |
| Nishioka <i>et al.</i> , 2018 [64]         | 73 | F  | No | Systemic LN and ulcerative mass of the esophagus                    | 1,5 | Yes | IV B  | NA                                                  | Soluble IL-2R and LDH increase                                                                     | PET-scan: cervical, axillary, mediastinal, supraclavicular, para-aortic, and inguinal LN Esophagogastroduodenoscopy: ulcerative mass in the mid-esophagus; BM+ ( <i>IgH</i> rearrangment identified, whitout tumor cell vizualised) | 8x R-CHOP, and DeVIC x4 for the relapse                                                                                   | Complete remission, then relapse (1 month later on cHL), then complete remission | 1  | 1  |
| Pezzella <i>et al.</i> , 2018 [65]         | 64 | M  | No | Ileus                                                               | NA  | No  | IV A  | Epigastric/perianal pain and intestinal obstruction | $\beta$ 2microglobulin mildly increase, hemoglobin, platelet, with blood cell, LDH in normal range | Abdominal MRI: ascite and a large bulky mass in the mesenteric region, with thickening and mild dilatation of the involved small bowel walls, no BM involvement on MRI                                                              | NA                                                                                                                        | NA                                                                               | NA | NA |
| Schmitz <i>et al.</i> , 2005 (case 1) [6]  | NA | NA | NA | NA                                                                  | NA  | NA  | NA    | NA                                                  | NA                                                                                                 | NA                                                                                                                                                                                                                                  | NA                                                                                                                        | NA                                                                               | NA | NA |
| Schmitz <i>et al.</i> , 2005 (case 2) [6]  | NA | NA | NA | NA                                                                  | NA  | NA  | NA    | NA                                                  | NA                                                                                                 | NA                                                                                                                                                                                                                                  | NA                                                                                                                        | NA                                                                               | NA | NA |
| Kingma <i>et al.</i> , 1994 (case 7) [66]  | 35 | M  | No | Inguinal LN                                                         | NA  | NA  | NA    | NA                                                  | NA                                                                                                 | NA                                                                                                                                                                                                                                  | NA                                                                                                                        | NA                                                                               | NA | NA |
| Kingma <i>et al.</i> , 1994 (case 8) [66]  | 38 | M  | No | Cervical LN                                                         | NA  | NA  | NA    | NA                                                  | NA                                                                                                 | NA                                                                                                                                                                                                                                  | NA                                                                                                                        | NA                                                                               | NA | NA |
| Kingma <i>et al.</i> , 1994 (case 10) [66] | 63 | M  | no | Unspecified (LN)                                                    | NA  | NA  | NA    | NA                                                  | NA                                                                                                 | NA                                                                                                                                                                                                                                  | NA                                                                                                                        | NA                                                                               | NA | NA |
| Kingma <i>et al.</i> , 1994 (case 11) [66] | 58 | M  | no | Cervical LN                                                         | NA  | NA  | NA    | NA                                                  | NA                                                                                                 | NA                                                                                                                                                                                                                                  | NA                                                                                                                        | NA                                                                               | NA | NA |

ASCT: Autologous stem-cell transplantation; BM+/-: Involvement of bone marrow or not; cHL: classical Hodgkin lymphoma; CRP: C reactive protein; CT-scan: computed tomography-scan; DLBCL: Diffuse large B cell lymphoma; DOD: Dead of disease; F: Female; FL: Follicular lymphoma; IL-2R: Interleukin 2 receptor; LDH: Lactate dehydrogenase; LN: Lymph node(s); M: Male; NA: Not available; PET-scan: Positron emission tomography-scan. For chemotherapy abbreviations, please see **Supplementary Text S1**.

**Supplementary Table S3: histopathological and molecular data of cHL/follicular composite lymphomas.**

| References                                   | cHL type | FL grade  | Separated / mixed contingents (*)       | Immunophenotype cHL                                                                               | Immunophenotype FL                                      | <i>BCL2</i> / <i>BCL6</i> translocations (cHL) | <i>BCL2</i> / <i>BCL6</i> translocations (FL) | Clonal B rearrangements (cHL) | Clonal B rearrangements (FL) | Other molecular alterations                             |
|----------------------------------------------|----------|-----------|-----------------------------------------|---------------------------------------------------------------------------------------------------|---------------------------------------------------------|------------------------------------------------|-----------------------------------------------|-------------------------------|------------------------------|---------------------------------------------------------|
| Thirumala <i>et al.</i> , 2000 [15]          | cHL-NS   | Grade 1-2 | Separated                               | CD30+, CD15+, CD20-                                                                               | NA                                                      | NA                                             | NA                                            | NA                            | NA                           | NA                                                      |
| Urano <i>et al.</i> , 2004 [54]              | cHL-MC   | Grade 2   | Separated (FL, 90%)                     | CD30+, CD15+, CD20+, CD79a+, CD10-, CD5-, CyclineD1-, CD45+, BCL2+ (focal), UCHL1-, EBER+ (focal) | CD20+, CD45+, CD79a+, BCL2+, CD10+, CD5-, UCHL1-, Bel1- | NA                                             | NA                                            | NA                            | NA                           | On whole tissue sample: t(3;14;18) gene translocation   |
| Vasudevan <i>et al.</i> , 2017 (case 1) [55] | cHL-MC   | Grade 1-2 | Mixed                                   | CD30+, CD15-, CD20-, PAX5+, CD45-                                                                 | CD20+, BCL6+                                            | NA                                             | NA                                            | NA                            | NA                           | NA                                                      |
| Vasudevan <i>et al.</i> , 2017 (case 2) [55] | cHL-MC   | Grade 1-2 | Mixed (interfollicular)                 | CD30+, CD15-, CD20+, PAX5+, CD45-                                                                 | CD20+, BCL2+, BCL6+                                     | NA                                             | NA                                            | NA                            | NA                           | NA                                                      |
| Vasudevan <i>et al.</i> , 2017 (case 3) [55] | cHL-MC   | Grade 1-2 | Mixed (interfollicular)                 | CD30+, CD15+ (focal), CD20-, PAX5+, CD45-                                                         | CD20+, BCL2+, BCL6+                                     | NA                                             | NA                                            | NA                            | NA                           | NA                                                      |
| Vasudevan <i>et al.</i> , 2017 (case4) [55]  | cHL-MC   | Grade 1-2 | Mixed (interfollicular)                 | CD30+, CD15-, CD20-, PAX5+, CD45-                                                                 | CD20+, BCL6+, BCL2+                                     | NA                                             | NA                                            | NA                            | NA                           | NA                                                      |
| Vasudevan <i>et al.</i> , 2017 (case 5) [55] | cHL-MC   | Grade 1-2 | Mixed (interfollicular)                 | CD30+, CD15+ (focal), CD20-, PAX5+, CD45-                                                         | CD20+, BCL6+, BCL2+                                     | NA                                             | NA                                            | NA                            | NA                           | NA                                                      |
| Huang <i>et al.</i> , 2022 (case 1) [56]     | cHL-MC   | Grade 2   | Mixed (interfollicular), equal quantity | CD30+, CD15+, CD20-, PAX5+, CD10-, CD45-, BCL6-, BCL2-, EBER+                                     | CD20+, CD45+, BCL6+, BCL2+, CD10+, EBER-                | NA                                             | NA                                            | NA                            | NA                           | NA                                                      |
| Huang <i>et al.</i> , 2022 (case 2) [56]     | cHL-MC   | Grade 3A  | Separated (FL, 70%)                     | CD30+, CD15+, CD20-, PAX5+, CD45-, BCL2-, BCL6-, EBER-                                            | CD20+, CD45+, BCL2-, BCL6+, EBER-                       | NA                                             | NA                                            | NA                            | NA                           | On whole tissue sample: clonal <i>IgH</i> rearrangement |
| Huang <i>et al.</i> , 2022 (case 3) [56]     | cHL-MC   | Grade 2   | Separated (FL, 65%)                     | CD30+, CD15-, CD20-, PAX5+, CD10-, CD45-, BCL6+, BCL2+, EBER-                                     | CD20+, CD45+, BCL2+, BCL6+, CD10+, EBER-                | NA                                             | <i>BCL2</i> translocation                     | NA                            | NA                           | NA                                                      |
| Huang <i>et al.</i> , 2022 (case 4) [56]     | cHL-NS   | Grade 1   | Separated (HL, 60%)                     | CD30+, CD15+, CD20+ (focal), PAX5+, CD10-, CD45-, BCL2-, BCL6-, EBER-                             | CD20+, CD45+, BCL2+, BCL6+, CD10+, EBER-                | Same <i>BCL2</i> translocation                 | Same <i>BCL2</i> translocation                | NA                            | NA                           | On whole tissue sample: clonal <i>IgH</i> rearrangement |
| Huang <i>et al.</i> , 2022 (case5) [56]      | cHL-MC   | Grade 3B  | Separated (FL, 70%)                     | CD30+, CD15+, CD20+ (focal), PAX5+, CD10-, CD45-, BCL2+, BCL6+, EBER-                             | CD20+, CD45+, BCL2+, BCL6+, CD10+, EBER-                | NA                                             | <i>BCL2</i> translocation                     | NA                            | NA                           | NA                                                      |
| Huang <i>et al.</i> , 2022 (case 6) [56]     | cHL-MC   | Grade 1   | Separated (FL, 60%)                     | CD30+, CD15+, CD20+ (focal), PAX5+, CD10-, CD45-, BCL2-, BCL6-                                    | CD20+, CD45+, BCL2+, BCL6+, CD10+                       | NA                                             | NA                                            | NA                            | NA                           | NA                                                      |
| Huang <i>et al.</i> , 2022 (case 7) [56]     | cHL-NS   | Grade 1   | Separated (FL, 80%)                     | CD30+, CD15-, CD20-, PAX5+, CD45-                                                                 | CD20+, CD45+                                            | NA                                             | NA                                            | NA                            | NA                           | NA                                                      |

|                                           |        |          |                           |                                                                       |                                          |    |                           |    |    |    |
|-------------------------------------------|--------|----------|---------------------------|-----------------------------------------------------------------------|------------------------------------------|----|---------------------------|----|----|----|
| Huang <i>et al.</i> , 2022 (case 8) [56]  | cHL-MC | Grade 2  | Separated (FL, 90%)       | CD30+, CD15+, CD20+ (focal), PAX5+, CD45+ (focal), BCL2-, BCL6-       | CD20+, CD45+BCL2+, BCL6+                 | NA | NA                        | NA | NA | NA |
| Huang <i>et al.</i> , 2022 (case 9) [56]  | cHL-NS | Grade 3B | Separated, equal quantity | CD30+, CD15-, CD20-, PAX5+, CD10-, CD45-, BCL2-, BCL6-, EBER-         | CD20+, CD45+, BCL2+, BCL6+CD10-, EBER-   | NA | NA                        | NA | NA | NA |
| Huang <i>et al.</i> , 2022 (case 10) [56] | cHL-MC | Grade 2  | Separated (FL, 95%)       | CD30+, CD15+, CD20+ (focal), PAX5+CD10-, CD45-, BCL2-, EBER+          | CD20+, CD45+BCL2+, BCL6+CD10+, EBER-     | NA | <i>BCL2</i> translocation | NA | NA | NA |
| Huang <i>et al.</i> , 2022 (case 11) [56] | cHL-MC | Grade 2  | Separated (FL, 95%)       | CD30+, CD15-, CD20+ (focal), PAX5+, CD10-, CD45-, BCL2+, BCL6+, EBER- | CD20+, CD45+, BCL2+, BCL6+, CD10-, EBER- | NA | NA                        | NA | NA | NA |
| Huang <i>et al.</i> , 2022 (case 12) [56] | cHL-MC | Grade 2  | Separated (HL, 60%)       | CD30+, CD15-, CD20-, PAX5+, CD10-, EBER-                              | CD20+, CD45+BCL2+, CD10+                 | NA | NA                        | NA | NA | NA |
| Huang <i>et al.</i> , 2022 (case 13) [56] | cHL-MC | Grade 3A | Separated (HL, 80%)       | CD30+, CD15-, CD20+ (focal), PAX5+, CD45-, BCL6+, EBER+               | CD20+, CD45+BCL2+, BCL6+, EBER-          | NA | NA                        | NA | NA | NA |
| Huang <i>et al.</i> , 2022 (case 14) [56] | cHL-MC | Grade 3A | Separated (FL, 70%)       | CD30+, CD15+, CD20-, PAX5+, CD45-                                     | CD20+, CD45+, BCL2+, BCL6+, CD10+        | NA | NA                        | NA | NA | NA |
| Huang <i>et al.</i> , 2022 (case 15) [56] | cHL-MC | Grade 1  | Separated (HL, 60%)       | CD30+, CD15-, CD20-, PAX5+, CD10-, CD45-, BCL2-, BCL6-, EBER-         | CD20+, CD45+, BCL2+, BCL6+, CD10+, EBER- | NA | NA                        | NA | NA | NA |
| Huang <i>et al.</i> , 2022 (case 16) [56] | cHL-MC | Grade 3A | Separated (FL, 90%)       | CD30+, CD15-, CD20+ (weak), PAX5+, CD10-, CD45-                       | CD20+, CD45+, CD10-                      | NA | NA                        | NA | NA | NA |
| Huang <i>et al.</i> , 2022 (case 17) [56] | cHL-MC | Grade 1  | Separated (FL, 70%)       | CD30+, CD15+, CD20-, PAX5+, CD10-, BCL6+, EBER+                       | CD20+, CD45+, BCL2+, BCL6+, CD10+, EBER- | NA | NA                        | NA | NA | NA |
| Huang <i>et al.</i> , 2022 (case 18) [56] | cHL-MC | Grade 3A | Separated (FL, 90%)       | CD30+, CD20-, PAX5+, CD45-, BCL6+                                     | CD20+, CD45+BCL2+, BCL6+, CD10+          | NA | NA                        | NA | NA | NA |
| Huang <i>et al.</i> , 2022 (case 19) [56] | cHL-MC | Grade 3A | Separated (FL, 60%)       | CD30+, CD15+, CD20-, PAX5+, CD45-, BCL6-, EBER-                       | CD20+, CD45+, BCL2+, BCL6+, CD10+, EBER- | NA | NA                        | NA | NA | NA |
| Huang <i>et al.</i> , 2022 (case 20) [56] | cHL-MC | Grade 3A | Separated (HL, 60%)       | CD30+, CD15+, CD20-, PAX5+, CD10-, CD45-, BCL2-, BCL6-, EBER-         | CD20+, CD45+, BCL6+, BCL2+, CD10+, EBER- | NA | NA                        | NA | NA | NA |

|                                             |        |           |                         |                                                                                                     |                                                                                     |                                                              |                                                              |                                 |                                 |                                                                                                                                                                                   |
|---------------------------------------------|--------|-----------|-------------------------|-----------------------------------------------------------------------------------------------------|-------------------------------------------------------------------------------------|--------------------------------------------------------------|--------------------------------------------------------------|---------------------------------|---------------------------------|-----------------------------------------------------------------------------------------------------------------------------------------------------------------------------------|
| Huang <i>et al.</i> , 2022 (case 21) [56]   | cHL-MC | Grade 1   | Separated (FL, 60%)     | CD30+, CD15+, CD20-, PAX5+, CD10-, CD45-, BCL2+, BCL6+, EBER-                                       | CD20+, CD45+, BCL2+, BCL6+, CD10+, EBER-                                            | Same <i>BCL2</i> translocation                               | Same <i>BCL2</i> translocation                               | NA                              | NA                              | NA                                                                                                                                                                                |
| Huang <i>et al.</i> , 2022 (case 22) [56]   | cHL-NS | Grade 3A  | Separated (HL, 90%)     | CD30+, CD15+, CD20-, PAX5+, CD10-, CD45-, BCL2-, BCL6-, EBER-                                       | CD20+, CD45+, BCL2+, BCL6+, CD10+, EBER-                                            |                                                              |                                                              | NA                              | NA                              | Common 16p duplication                                                                                                                                                            |
| Trecourt <i>et al.</i> , 2022 (case 1) [10] | G      | Grade 1-2 | Separated (FL)          | CD30+, CD15+ (focal), CD20-, PAX5+, CD10-, BCL2-, BCL6-, EBER+, MUM1+                               | CD20+, BCL2+, BCL6+, CD10+, CD30-, CD15-, EBER-, MUM1-, PAX5+                       | Same <i>BCL2</i> translocation; No <i>BCL6</i> translocation | Same <i>BCL2</i> translocation; No <i>BCL6</i> translocation | NA                              | NA                              | Common variants of <i>BCL2</i> , <i>EP300</i> , <i>BCOR</i> ; cHL only: variants of <i>XPO1</i> , <i>TNFAIP3</i> ; FL only: variants of <i>BCL2</i> , <i>KMT2D</i> , <i>EP300</i> |
| Trecourt <i>et al.</i> , 2022 (case 4) [10] | G      | Grade 3A  | Separated (FL)          | CD30+, CD15-, CD20-, PAX5-, CD10-, BCL2-, BCL6-, EBER+, BOB1+, OCT2-, MUM1-                         | CD20+, BCL2+, BCL6+, CD10-, CD30-, CD15-, EBER-, MUM1-, PAX5+, BOB1-, OCT2+         | No <i>BCL6</i> translocation                                 | <i>BCL2</i> translocation; No <i>BCL6</i> translocation      | NA                              | NA                              | NA                                                                                                                                                                                |
| Trecourt <i>et al.</i> , 2022 (case 5) [10] | G      | Grade 1-2 | Separated (HL)          | CD30+, CD15-, CD20-, PAX5+, CD79a+ (focal), CD10-, BCL2-, BCL6-, EBER-, BOB1+, OCT2+ (focal), MUM1+ | CD20+, CD79a+, BCL2+, BCL6+CD10+, CD30-, CD15-, EBER-, MUM1-, PAX5+, BOB1-, OCT2-   | Same <i>BCL2</i> translocation; No <i>BCL6</i> translocation | Same <i>BCL2</i> translocation; No <i>BCL6</i> translocation | NA                              | NA                              | Common variants of <i>ARID1A</i> , <i>EP300</i> , <i>KMT2D</i> , <i>SF3B1</i> ; cHL only: variants of <i>CREBBP</i> ; FL only: variants of <i>BCL2</i> , <i>KMT2D</i>             |
| Trecourt <i>et al.</i> , 2022 (case 6) [10] | G      | Grade 1-2 | Mixed (FL)              | CD30+, CD15-, CD20+ (focal), PAX5+, CD10-, BCL6-, EBER+, BOB1+, OCT2+, MUM1+                        | CD20+, BCL2-, BCL6+, CD10+, CD30-, CD15-, EBER-, MUM1-                              | No <i>BCL2/BCL6</i> translocation                            | No <i>BCL2/BCL6</i> translocation                            | NA                              | NA                              | NA                                                                                                                                                                                |
| Trecourt <i>et al.</i> , 2022 (case 7) [10] | G      | Grade 1-2 | Mixed (FL)              | CD30+, CD15+ (focal), CD20-, PAX5+, CD10-, BCL6-, BCL2-, EBER-                                      | CD20+, BCL2+, BCL6+, CD10+, CD30-, CD15-, EBER-, PAX5+                              | NA                                                           | No <i>BCL2/BCL6</i> translocation                            | NA                              | NA                              | NA                                                                                                                                                                                |
| Trecourt <i>et al.</i> , 2022 (case 8) [10] | cHL-NS | Grade 1-2 | Separated (synchronous) | CD30+, CD15+, CD20-, PAX5+, CD79a-, CD10+, BCL2-, BCL6+, EBER-, BOB1-, OCT2-, MUM1+                 | CD20+, BCL2+, BCL6+, CD10+, CD30-, EBER-                                            | No <i>BCL2/BCL6</i> translocation                            | No <i>BCL2/BCL6</i> translocation                            | Common <i>IgH</i> rearrangement | Common <i>IgH</i> rearrangement | NA                                                                                                                                                                                |
| Trecourt <i>et al.</i> , 2022 (case 9) [10] | cHL-NS | Grade 1-2 | Mixed                   | CD30+, CD15+ (focal), CD20-, PAX5+, CD79a-, CD10-, BCL2+, BCL6+, EBER+, BOB1-, OCT2-, MUM1+         | CD20+, CD79a+, BCL2+, BCL6+, CD10+, CD30-, CD15-, EBER-, MUM1-, PAX5+, BOB1+, OCT2+ | Same <i>BCL2</i> translocation; No <i>BCL6</i> translocation | Same <i>BCL2</i> translocation; No <i>BCL6</i> translocation | NA                              | NA                              | NA                                                                                                                                                                                |



|                                              |        |           |                         |                                                                                                                     |                                                                                            |                                                              |                                                              |                                 |                                     |    |
|----------------------------------------------|--------|-----------|-------------------------|---------------------------------------------------------------------------------------------------------------------|--------------------------------------------------------------------------------------------|--------------------------------------------------------------|--------------------------------------------------------------|---------------------------------|-------------------------------------|----|
| Trecourt <i>et al.</i> , 2022 (case 11) [10] | cHL-NS | Grade 1-2 | Mixed (HL)              | CD30+, CD15-, CD20-, PAX5+, CD79a-, CD10-, BCL2-, BCL6-, EBER-, BOB1-, OCT2-, MUM1+                                 | CD20+, CD79a+, BCL2(E17)+, BCL6+, CD10+, CD30-, CD15-, EBER-, MUM1+, PAX5+                 | Same <i>BCL2/BCL6</i> translocation                          | Same <i>BCL2/BCL6</i> translocation                          | Common <i>IgH</i> rearrangement | Common <i>IgH</i> rearrangement     | NA |
| Trecourt <i>et al.</i> , 2022 (case 22) [10] | G      | Grade 1-2 | Mixed (HL)              | CD30+, CD15+, CD20-, PAX5+, CD79a-, CD10-, BCL2+, BCL6-, EBER-, BOB1-, OCT2-, MUM1+                                 | CD20+, BCL2+, BCL6+, CD10+ (focal), CD30-, CD15-, EBER-, MUM1+, PAX5+, BOB1+, OCT2+        | No <i>BCL2/BCL6</i> translocation                            | No <i>BCL2/BCL6</i> translocation                            | DNA degradation                 | Clonal <i>IgH/IgK</i> rearrangement | NA |
| Trecourt <i>et al.</i> , 2022 (case 3) [10]  | G      | Grade 3A  | Separated               | CD30+, CD15-, CD20+ (focal), CD79a+ (focal), CD10+ (focal), BCL2+, BCL6+ (focal), EBER+, MUM1+                      | CD20+, CD79a-, BCL2+, BCL6+, CD10+, CD30-, CD15-, EBER-, MUM1-                             | Same <i>BCL2</i> translocation; No <i>BCL6</i> translocation | Same <i>BCL2</i> translocation; No <i>BCL6</i> translocation | NA                              | NA                                  | NA |
| Trecourt <i>et al.</i> , 2022 (case 10) [10] | cHL-NS | Grade 1-2 | Separated (synchronous) | CD30+, CD15-, CD20-, CD79a-, PAX5+, BOB1+, OCT2+, MUM1+, CD10-, BCL6+, BCL2-, EBER-                                 | CD20+, CD79a+, CD30-, CD10+, BCL6+, BCL2+, EBER-                                           | Same <i>BCL2</i> translocation; No <i>BCL6</i> translocation | Same <i>BCL2</i> translocation; No <i>BCL6</i> translocation | Common <i>IgH</i> rearrangement | Common <i>IgH</i> rearrangement     | NA |
| Trecourt <i>et al.</i> , 2022 (case 12) [10] | G      | Grade 1-2 | Mixed                   | CD30+, CD15+, CD20-, CD79a-, PAX5+, BOB1+, OCT2+, MUM1+, CD10-, BCL6+, BCL2+, EBER-                                 | CD20+ (weak), CD79a+, PAX5+, BOB1+, OCT2+, CD30-, CD15-, MUM1+, CD10+, BCL6+, BCL2+, EBER- | No <i>BCL2/BCL6</i> translocation                            | No <i>BCL2/BCL6</i> translocation                            | NA                              | NA                                  | NA |
| Maeshima <i>et al.</i> , 2015 (case 1) [3]   | cHL    | Grade 2   | Mixed (intefollicular)  | CD30+, CD15-, CD20+ (focal), PAX5+, CD79a-, EBER-, BOB1-, OCT2+                                                     | CD20+, BCL2+, CD10+, CD30-                                                                 | Same <i>BCL2</i> translocation                               | Same <i>BCL2</i> translocation                               | NA                              | NA                                  | NA |
| Maeshima <i>et al.</i> , 2015 (case 2) [3]   | cHL-MC | Grade 1   | Separated (synchronous) | CD30+, CD15+, CD20-, PAX5+, CD79a+ (focal), EBER-, BOB1-, OCT2-                                                     | CD20+, BCL2+, CD10+, CD4-                                                                  | Same <i>BCL2</i> translocation                               | Same <i>BCL2</i> translocation                               | NA                              | NA                                  | NA |
| Maeshima <i>et al.</i> , 2015 (case 3) [3]   | cHL-MC | Grade 1   | Separated (synchronous) | CD30+, CD15-, CD20-, PAX5+CD79a+ (focal), EBER-, BOB1-, OCT2-CD30+, CD10+, CD15+, CD20+ (focal), PAX5+CD79a-, EBER- | CD20+, BCL2+, CD10+                                                                        | Same <i>BCL2</i> translocation                               | Same <i>BCL2</i> translocation                               | NA                              | NA                                  | NA |
| Maeshima <i>et al.</i> , 2015 (case 4) [3]   | cHL-MC | Grade 2   | separated (synchronous) | CD30+, CD15+, CD20+ (focal), PAX5+CD79a-, EBER-                                                                     | CD20+, BCL2+, CD10+                                                                        | No <i>BCL2</i> translocation                                 | NA                                                           | NA                              | NA                                  | NA |
| Maeshima <i>et al.</i> , 2015 (case 5) [3]   | cHL    | Grade 1   | Separated (synchronous) | CD30+, CD15+, CD20+ (focal), PAX5+, CD79a+ (focal), EBER-                                                           | CD20+, BCL2+CD10+                                                                          | NA                                                           | <i>BCL2</i> translocation                                    | NA                              | NA                                  | NA |

| BOB1+ (focal), OCT2+ (focal)                   |        |                   |                    |                                           |                                   |                                |                                |                                                                                                 |                                                                                                 |                                                                                                                                                                              |
|------------------------------------------------|--------|-------------------|--------------------|-------------------------------------------|-----------------------------------|--------------------------------|--------------------------------|-------------------------------------------------------------------------------------------------|-------------------------------------------------------------------------------------------------|------------------------------------------------------------------------------------------------------------------------------------------------------------------------------|
|                                                |        |                   |                    |                                           |                                   |                                |                                | Common <i>IgH/IgK</i> rearrangements, common and different <i>V</i> gene somatic hypermutations | Common <i>IgH/IgK</i> rearrangements, common and different <i>V</i> gene somatic hypermutations |                                                                                                                                                                              |
| Küppers <i>et al.</i> , 2001 [12]              | cHL-MC | NA                | NA                 | CD30+, CD15+, CD20-, EBER-                | CD20+, CD10+, CD30-, CD15-, EBER- | NA                             | NA                             |                                                                                                 |                                                                                                 | NA                                                                                                                                                                           |
| Gonzalez <i>et al.</i> , 1991 (case 2) [14]    | cHL-NS | NA                | NA (NHL, 75-90%)   | CD15+, CD20+, CD45-, UCHL1-               | CD20+, CD45+, UCHL1-, CD15-       | NA                             | NA                             | NA                                                                                              | NA                                                                                              | NA                                                                                                                                                                           |
| Gonzalez <i>et al.</i> , 1991 (case 4) [14]    | cHL-NS | NA                | NA, equal quantity | NA                                        | NA                                | NA                             | NA                             | NA                                                                                              | NA                                                                                              | NA                                                                                                                                                                           |
| Gonzalez <i>et al.</i> , 1991 (case 8) [14]    | cHL-NS | NA                | NA (NHL, 90%)      | CD15+, CD20-                              | CD20+, CD45+, CD15-               | NA                             | NA                             | NA                                                                                              | NA                                                                                              | NA                                                                                                                                                                           |
| Bräuminger <i>et al.</i> , (case 1) 1999 [11]  | cHL-MC | Grade 1-2         | Mixed              | CD30+, CD15+, CD20+ (focal)               | CD20+, CD30-, CD15-               | NA                             | NA                             | Common <i>IgH/IgK</i> rearrangements, common and different <i>V</i> gene somatic hypermutations | Common <i>IgH/IgK</i> rearrangements, common and different <i>V</i> gene somatic hypermutations | NA                                                                                                                                                                           |
| Linck <i>et al.</i> , 2005 [57]                | cHL-MC | Grade 1-2         | NA                 | CD30+, CD15-, CD20+, BCL2+                | CD20+, BCL2+, CD10+               | NA                             | NA                             | NA                                                                                              | NA                                                                                              | NA                                                                                                                                                                           |
| Jaffe <i>et al.</i> , 1992 (case 2) [58]       | cHL    | NA                | NA                 | CD15+, CD20-                              | NA                                | NA                             | NA                             | NA                                                                                              | NA                                                                                              | NA                                                                                                                                                                           |
| Jaffe <i>et al.</i> , 1992 (case 5) [58]       | cHL    | NA                | NA                 | CD15+, CD20-                              | NA                                | NA                             | NA                             | NA                                                                                              | NA                                                                                              | NA                                                                                                                                                                           |
| Jaffe <i>et al.</i> , 1992 (case 13) [58]      | cHL-NS | NA                | NA                 | CD15+, CD20-                              | NA                                | NA                             | NA                             | NA                                                                                              | NA                                                                                              | NA                                                                                                                                                                           |
| Jaffe <i>et al.</i> , 1992 (case 1) [58]       | cHL-NS | NA                | NA                 | CD15+, CD20-                              | NA                                | NA                             | NA                             | NA                                                                                              | NA                                                                                              | NA                                                                                                                                                                           |
| Hansmann <i>et al.</i> , 1989 (case 1.3) [59]  | cHL-MC | NA                | NA                 | CD30+, CD15+                              | CD15-                             | NA                             | NA                             | NA                                                                                              | NA                                                                                              | NA                                                                                                                                                                           |
| Hansmann <i>et al.</i> , 1989 (case 1.10) [59] | cHL-NS | NA                | NA                 | CD30+, CD15+                              | CD15-                             | NA                             | NA                             | NA                                                                                              | NA                                                                                              | NA                                                                                                                                                                           |
| Hansmann <i>et al.</i> , 1989 (case 2.1) [59]  | cHL-MC | NA                | NA                 | CD30+, CD15-                              | NA                                | NA                             | NA                             | NA                                                                                              | NA                                                                                              | NA                                                                                                                                                                           |
| Hansmann <i>et al.</i> , 1989 (case 2.2) [59]  | cHL-MC | NA                | NA                 | CD15-                                     | NA                                | NA                             | NA                             | NA                                                                                              | NA                                                                                              | NA                                                                                                                                                                           |
| Hansmann <i>et al.</i> , 1989 (case 2.3) [59]  | cHL-MC | NA                | NA                 | CD30+, CD15-                              | NA                                | NA                             | NA                             | NA                                                                                              | NA                                                                                              | NA                                                                                                                                                                           |
| Hansmann <i>et al.</i> , 1989 (case 2.4) [59]  | cHL-MC | NA                | NA                 | CD15-                                     | NA                                | NA                             | NA                             | NA                                                                                              | NA                                                                                              | NA                                                                                                                                                                           |
| Hansmann <i>et al.</i> , 1989 (case 2.5) [59]  | cHL-NS | NA                | NA                 | CD15-                                     | NA                                | NA                             | NA                             | NA                                                                                              | NA                                                                                              | NA                                                                                                                                                                           |
| Demurtas <i>et al.</i> , 2011 (case 16) [60]   | cHL    | Grade 1-2         | NA                 | NA                                        | CD10+ (cytometry)                 | NA                             | NA                             | NA                                                                                              | NA                                                                                              | On whole tissue sample: <i>BCL2</i> translocation, no clonal B rearrangement, cHL contingent: 55,XX,+add(3)(q11.2),-4,-6,+add(7)(q11.2),-8,-9,-11,-13,-13,?(14;18)(q32;q21), |
| Yoshida <i>et al.</i> , 2012 (case 1) [61]     | cHL-MC | FL <i>in situ</i> | NA                 | CD30+, CD15+, CD20-, BCL2+, EBER+ (focal) | CD20+, BCL2+, CD3-, CD30-, CD15-  | Same <i>BCL2</i> translocation | Same <i>BCL2</i> translocation | NA                                                                                              | NA                                                                                              |                                                                                                                                                                              |

|                                            |        |           |                               |                                                                                                                   |                                                                  |                                |                                |                                                                                            |                                                                                            |                                                                                                            |
|--------------------------------------------|--------|-----------|-------------------------------|-------------------------------------------------------------------------------------------------------------------|------------------------------------------------------------------|--------------------------------|--------------------------------|--------------------------------------------------------------------------------------------|--------------------------------------------------------------------------------------------|------------------------------------------------------------------------------------------------------------|
| add(15)(p11.2),+15 mar [1/4]               |        |           |                               |                                                                                                                   |                                                                  |                                |                                |                                                                                            |                                                                                            |                                                                                                            |
| Yoshida <i>et al.</i> , 2012 (case 2) [61] | cHL-MC | Grade 2   | NA                            | CD30+, CD15+, CD20-, BCL2+                                                                                        | CD20+, BCL2+, CD3-, CD30-, CD15-                                 | Not interpretable              | <i>BCL2</i> translocation      | NA                                                                                         | NA                                                                                         | NA                                                                                                         |
| Wang <i>et al.</i> , 2016 (case 1) [62]    | cHL-MC | Grade 1-2 | Separated (synchronous)       | CD30+, CD15+, CD20+ (focal), PAX5+, CD79a+ (focal), CD10-, CD5+, CD3+ (focal), CD45+ (focal), BCL2+, EBER-, MUM1+ | CD20+, CD45+, BCL2+, CD10+, CD3-, CD15-, EBER-                   | Same <i>BCL2</i> translocation | Same <i>BCL2</i> translocation | Common <i>IgH</i> rearrangement                                                            | Common <i>IgH</i> rearrangement                                                            | NA                                                                                                         |
| Kim <i>et al.</i> , 2022 [63]              | cHL-NS | Grade 1   | Separated                     | CD30+, CD15+, CD20-, PAX5+, CD3-, EBER-, MUM1+                                                                    | CD20+, BCL2+, CD10+, CD3-, CD15-, EBER-                          | NA                             | NA                             | NA                                                                                         | NA                                                                                         | NA                                                                                                         |
| Nishioka <i>et al.</i> , 2018 [64]         | cHL    | NA        | Mixed (interfollicular areas) | CD30+, CD15+, EBER-                                                                                               | CD20+, BCL2+ (weak), CD10+, CD3-                                 | NA                             | NA                             | Common <i>IgH</i> rearrangement                                                            | Common <i>IgH</i> rearrangement                                                            | On whole tissue sample: complex karyotype t(14:18)(q32:p21), and t(14:18) ( <i>BCL2/IgH</i> translocation) |
| Pezzella <i>et al.</i> , 2018 [65]         | cHL    | Grade 1-2 | NA (FL, 90%)                  | CD30+, CD20+ (focal), PAX5+, CD10-, CyclinD1-, BCL2+, BCL6-, EBER-, MUM1+                                         | CD20+, BCL2+, BCL6+ (weak), CyclinD1-, CD3-, CD30-, CD15-, EBER- | NA                             | NA                             | NA                                                                                         | NA                                                                                         | NA                                                                                                         |
| Schmitz <i>et al.</i> , 2005 (case 1) [6]  | cHL    | NA        | NA                            | BCL2+, EBER-                                                                                                      | EBER-                                                            | Same <i>BCL2</i> translocation | Same <i>BCL2</i> translocation | Common <i>IgH</i> rearrangement, common and different <i>V</i> gene somatic hypermutations | Common <i>IgH</i> rearrangement, common and different <i>V</i> gene somatic hypermutations | NA                                                                                                         |
| Schmitz <i>et al.</i> , 2005 (case 2) [6]  | cHL    | NA        | NA                            | BCL2+, EBER-                                                                                                      | EBER-                                                            | Same <i>BCL2</i> translocation | Same <i>BCL2</i> translocation | Common <i>IgH</i> rearrangement, common and different <i>V</i> gene somatic hypermutations | Common <i>IgH</i> rearrangement, common and different <i>V</i> gene somatic hypermutations | NA                                                                                                         |
| Kingma <i>et al.</i> , 1994 (case 7) [66]  | cHL-NS | NA        | NA                            | NA                                                                                                                | NA                                                               | NA                             | NA                             | NA                                                                                         | NA                                                                                         | NA                                                                                                         |
| Kingma <i>et al.</i> , 1994 (case 8) [66]  | cHL    | NA        | NA                            | NA                                                                                                                | NA                                                               | NA                             | NA                             | NA                                                                                         | NA                                                                                         | NA                                                                                                         |
| Kingma <i>et al.</i> , 1994 (case 10) [66] | cHL    | NA        | NA                            | NA                                                                                                                | NA                                                               | NA                             | NA                             | NA                                                                                         | NA                                                                                         | NA                                                                                                         |
| Kingma <i>et al.</i> , 1994 (case 11) [66] | cHL    | NA        | NA                            | NA                                                                                                                | NA                                                               | NA                             | NA                             | NA                                                                                         | NA                                                                                         | NA                                                                                                         |

cHL: classical Hodgkin lymphoma; EBER: Epstein-Barr virus-encoded small RNA *in situ* hybridization; FL: Follicular lymphoma; G: Granulomatous; MC: Mixed cellularity; NS: Nodular sclerosis; NA: Not available; NHL: Non-Hodgkin lymphoma; +: positive; -: negative.

\*Major/predominant contingent and percentage.

Supplementary Table S4: clinical and laboratory data of cHL/mantle-cell composite lymphomas.

| References                                | Age (years) | Sex | History of lymphoma                                                | Location                                                                          | Tumor size (cm) | B symptoms | Ann Arbor stage | Other symptoms                                                     | Laboratory data                                                                                       | Extension assessment                                                                                                                     | Treatment                                                                                                     | Outcome                                                      | Follow-up duration (months) | Time of relapse / DOD (months) |
|-------------------------------------------|-------------|-----|--------------------------------------------------------------------|-----------------------------------------------------------------------------------|-----------------|------------|-----------------|--------------------------------------------------------------------|-------------------------------------------------------------------------------------------------------|------------------------------------------------------------------------------------------------------------------------------------------|---------------------------------------------------------------------------------------------------------------|--------------------------------------------------------------|-----------------------------|--------------------------------|
| Caleo <i>et al.</i> , 2003 (case 1) [67]  | 61          | M   | Chronic lymphoproliferative disorder, unspecified 10 years earlier | Splenomegaly without peripheral LN                                                | NA              | No         | IV A            | Abdominal pain and distension                                      | Lymphocytosis                                                                                         | NA                                                                                                                                       | NA                                                                                                            | NA                                                           | NA                          | NA                             |
| Caleo <i>et al.</i> , 2003 (case 2) [67]  | 66          | M   | No                                                                 | Tonsillar and eyelid mass and cervical LN                                         | NA              | No         | II A            | No                                                                 | NA                                                                                                    | NA                                                                                                                                       | NA                                                                                                            | NA                                                           | NA                          | NA                             |
| Giua <i>et al.</i> , 2015 [68]            | 89          | F   | No                                                                 | Mediastinal and axillary LN                                                       | 1.5-3           | No         | IV A            | Pulmonary embolism, splenomegaly, hepatomegaly, syncope            | Anemia                                                                                                | CT-scan: axillary and mediastinal LN                                                                                                     | Prednisone only                                                                                               | NA                                                           | NA                          | NA                             |
| Hayes <i>et al.</i> , 2006 [69]           | 69          | F   | No                                                                 | Cervical and bilateral axillary LN                                                | 1.6             | Yes        | VI B            | NA                                                                 | Lymphocytosis, LDH and Ig in normal range                                                             | BM+: MCL without cHL                                                                                                                     | CHOPx3 then fludarabine and cyclophosphamide x3                                                               | Partial remission, death of pneumonia 11 months later        | 11                          | NA                             |
| Kanai <i>et al.</i> , 2021 [70]           | 70          | M   | MCL 9 years earlier treated by autologous stem cell transplant     | Cervical and paraaortic LN, splenomegaly                                          | NA              | No         | VI A            | NA                                                                 | Anemia, ASAT, ALAT, LDH, Alkaline Phosphatase, bilirubine and soluble interleukin-2 receptor increase | Autopsy: BM+: MCL and HL, hemophagocytosis, bipleen and bile duct CT-scan: cervical and para-aortic LN, splenomegaly                     | Bendamustine                                                                                                  | DOD 54 days after admission (disease progression)            | NA                          | NA                             |
| Schmitz <i>et al.</i> , 2005 (case 5) [6] | NA          | NA  | MCL                                                                | NA                                                                                | NA              | NA         | NA              | NA                                                                 | NA                                                                                                    | NA                                                                                                                                       | NA                                                                                                            | NA                                                           | NA                          | NA                             |
| Kramer <i>et al.</i> , 2019 [71]          | 63          | M   | Orbital MCL lymphoma 8 years earlier                               | Cervical and axillary and inguinal LN                                             | NA              | No         | III A           | Facial swelling for 2 months (bilateral parotid gland enlargement) | NA                                                                                                    | NA                                                                                                                                       | Bendamustine and Rituximabx6                                                                                  | Partial remission                                            | NA                          | NA                             |
| Murray <i>et al.</i> , 2017 [72]          | 78          | M   | No                                                                 | Splenomegaly and neck, supraclavicular, axillary, mediastinal, retroperitoneal LN | NA              | No         | IV A            | Weakness, malaise, dyspnea                                         | LDH increase                                                                                          | PET-scan: splenomegaly and neck, supraclavicular, axillary, mediastinal, retroperitoneal LN and mildly activity of bone marrow; BM+: MCL | R-CHOP-like chemotherapy (rituximab-cytosine-arabinoside alternating with 1 course of high-dose methotrexate) | Complete remission                                           | NA                          | NA                             |
| Schneider <i>et al.</i> , 2014 [8]        | 70          | M   | MCL                                                                | Cervical, axillary and abdominal LN                                               | NA              | No         | III A           | NA                                                                 | NA                                                                                                    | NA                                                                                                                                       | Vinblastine-adriamycine-decarbazine x3 alternating with 2x R-CHOP                                             | Clinical remission, but death of sepsis just after treatment | NA                          | NA                             |
| Sharma <i>et al.</i> , 2019 [73]          | 62          | M   | No                                                                 | Tonsil and LN                                                                     | 6.4             | No         | II A            | Difficulty swallowing, weight loss                                 | No abnormalities of routine biochemical test and blood count                                          | NA                                                                                                                                       | NA                                                                                                            | NA                                                           | NA                          | NA                             |
| Tinguely <i>et al.</i> , 2003 [9]         | 42          | M   | MCL 3 years earlier                                                | Abdominal LN and spleen                                                           | NA              | NA         | II A            | NA                                                                 | NA                                                                                                    | NA                                                                                                                                       | NA                                                                                                            | NA                                                           | NA                          | NA                             |

ALAT: Alanine-aminotransferase; ASAT: Aspartate-aminotransferase; BM+/-: Involvement or not of bone marrow; cHL: classical Hodgkin lymphoma; CT-scan: computed tomography-scan; DOD: Dead of disease; F: Female; Ig: Immunoglobulin; LDH: Lactate dehydrogenase; LN: Lymph node(s); M: Male; MCL: Mantle-cell lymphoma; NA: Not available; PET-scan: Positron emission tomography-scan. For chemotherapy abbreviations, please see **Supplementary Text S1**.

**Supplementary Table S5: histopathological and molecular data of cHL/mantle-cell composite lymphomas.**

| References                                | cHL type | MCL type  | Separated / mixed contingents | Immunophenotype cHL                                                                                 | Immunophenotype MCL                                                                                | <i>CCDN1</i> translocations (cHL) | <i>CCDN1</i> translocations (MCL) | Clonal B rearrangements (cHL)                                                       | Clonal B rearrangements (MCL)                                                      | Other molecular alterations                                                                                                                                                                |
|-------------------------------------------|----------|-----------|-------------------------------|-----------------------------------------------------------------------------------------------------|----------------------------------------------------------------------------------------------------|-----------------------------------|-----------------------------------|-------------------------------------------------------------------------------------|------------------------------------------------------------------------------------|--------------------------------------------------------------------------------------------------------------------------------------------------------------------------------------------|
| Caleo <i>et al.</i> , 2003 (case 1) [67]  | cHL      | Classical | Mixed                         | CD30+, CD15+, CD20-, CD10-, CD5-, CyclinD1-, IgD-, BCL2-, BCL6-, EBER+, LMP1+, CD23-, CD43-         | CD20+, BCL2+, BCL6-, CyclinD1+, IgD+, CD10-, CD43+, CD5-, CD30-, CD15-, EBER-, LMP1-               | -                                 | +                                 | Distinct <i>IgH</i> rearrangement                                                   | Distinct <i>IgH</i> rearrangement                                                  | cHL: aneuploid; MCL: diploid                                                                                                                                                               |
| Caleo <i>et al.</i> , 2003 (case 2) [67]  | cHL      | Classical | NA                            | CD30+, CD15+, CD20-, CD10-, CD5-, CD3-, CyclinD1-, IgD-, BCL2-, BCL6-, EBER+, LMP1+, CD23-, CD43-   | CD20+, BCL2+, BCL6-, CyclinD1+, IgD+, CD10-, CD5+ (focal), CD23-, CD43+, CD30, CD15-, EBER-, LMP1- | -                                 | +                                 | Distinct <i>IgH</i> rearrangement                                                   | Distinct <i>IgH</i> rearrangement                                                  | cHL: aneuploid; MCL: diploid                                                                                                                                                               |
| Giua <i>et al.</i> , 2015 [68]            | cHL      | Classical | NA                            | CD30+, CD15+, CD20-, CyclinD1-                                                                      | CD20+, CD79a+, CyclinD1+, CD5-, CD23-                                                              | -                                 | +                                 | NA                                                                                  | NA                                                                                 | NA                                                                                                                                                                                         |
| Hayes <i>et al.</i> , 2006 [69]           | cHL-NS   | Classical | NA                            | CD30+, CD15+, CD20-, ALK1-, EBER-                                                                   | CD20+, CD79a+, CyclinD1+, CD5+, CD23+, CD3+, EBER-                                                 | NA                                | NA                                | NA                                                                                  | NA                                                                                 | On whole tissue sample: t(11;14)                                                                                                                                                           |
| Kanai <i>et al.</i> , 2021 [70]           | cHL-LR   | Classical | Separated                     | CD30+, CD15+, CD20-, PAX5+, CD5-, CyclinD1+ (focal), SOX11-, EBER+, p53+, BOB1-, OCT2-              | CD20+, BCL2+, BOB1-, CyclinD1+, SOX11+, CD10-, CD5-, CD23-, p53+, CD3-, EBER-, PAX5+               | Same rearrangement                | Same rearrangement                | NA                                                                                  | NA                                                                                 | On whole tissue sample: Clonal <i>IgH</i> rearrangement                                                                                                                                    |
| Schmitz <i>et al.</i> , 2005 (case 5) [6] | cHL      | Classical | NA                            | BCL2-, EBER+                                                                                        | BCL2+                                                                                              | Same rearrangement                | Same rearrangement                | Distinct <i>IgH</i> rearrangement, presence of <i>V</i> gene somatic hypermutations | Distinct <i>IgH</i> rearrangement, absence of <i>V</i> gene somatic hypermutations | No <i>TP53</i> mutation (both contingents)                                                                                                                                                 |
| Kramer <i>et al.</i> , 2019 [71]          | cHL      | Classical | Mixed                         | CD30+, CD15+, CD20-, PAX5+, CD79a+, CD5+ (focal), CD3-, CyclinD1+, CD45-, EBER-                     | CD45+, CD79a+, CyclinD1+, CD23-, CD30-, CD15-, PAX5+                                               | Same rearrangement                | Same rearrangement                | NA                                                                                  | NA                                                                                 | On whole tissue sample: Clonal <i>IgH</i> rearrangement (whole tissue sample); abnormal karyotype: 47, XY,+3,del(6)(q15q21),t(11;14)(q13;q32)                                              |
| Murray <i>et al.</i> , 2017 [72]          | cHL-MC   | Blastoid  | Mixed                         | CD30+, CD15+, CD20+ (focal/weak), PAX5+, CD79a-, ALK1-, CyclinD1-, CD45-, EBER+, p53+, OCT2+, MUM1+ | CD20+, CD45+, BCL2+BCL6-, CyclinD1+, CD10-, CD5+, CD23-, CD43+, p53-, PAX5+                        | Same rearrangement                | Same rearrangement                | NA                                                                                  | NA                                                                                 | On whole tissue sample: clonal rearrangement of <i>IgH</i> and <i>IgK</i>                                                                                                                  |
| Schneider <i>et al.</i> , 2014 [8]        | cHL-LR   | Classical | Mixed                         | CD30+, CD15+, CD20+ (focal), PAX5+, CD79a-, CD5-, CyclinD1+, SOX11+, CD45+ (focal), BCL2+, OCT2+    | CD20+, CD45+, CD79a+BCL2-, CyclinD1+, SOX11+, CD5+, CD30-, CD15-, PAX5+, OCT2+                     | Same rearrangement                | Same rearrangement                | Common <i>IgH</i> rearrangement and <i>V</i> gene somatic hypermutations            | Common <i>IgH</i> rearrangement and <i>V</i> gene somatic hypermutations           | In both contingents: same <i>TP53</i> mutations (exon 5, Y163C) and <i>TP53/17p13</i> heterozygous deletions, no mutation of <i>SOCS1</i> , <i>TNFAIP3</i> , <i>NFKB1A</i> , <i>NOTCH1</i> |

|                                      |     |           |       |                                                                                                       |                                                                |    |    |                                                                                            |                                    |    |
|--------------------------------------|-----|-----------|-------|-------------------------------------------------------------------------------------------------------|----------------------------------------------------------------|----|----|--------------------------------------------------------------------------------------------|------------------------------------|----|
| Sharma <i>et al.</i> ,<br>2019 [73]  | cHL | Classical | Mixed | CD30+, CD15+, CD20-<br>, PAX5+, CD45-<br>BCL6-, LMP1+                                                 | CD20+, CD45+, BC2+,<br>BCL6-, CyclinD1+,<br>CD10-, CD5+, CD23- | NA | NA | NA                                                                                         | NA                                 | NA |
| Tinguely <i>et al.</i> ,<br>2003 [9] | cHL | Classical | Mixed | CD30+, CD15+,<br>CD20+ (focal), CD3-<br>EBV+ (focal)LMP1+<br>(focal), BOB1+ (focal),<br>OCT2+ (focal) | CD20+, CyclinD1+,<br>EBER-, LMP1-<br>BOB1+, OCT2+              | NA | NA | Common <i>IgH</i><br>rearrangement, presence of<br><i>V</i> gene somatic<br>hypermutations | Common <i>IgH</i><br>rearrangement | NA |

cHL: classical Hodgkin lymphoma; EBER: Epstein-Barr virus-encoded small RNA *in situ* hybridization; LR: lymphocyte rich; MC: Mixed-cellularity; MCL: Mantle-cell lymphoma; NA: Not available; NS: Nodular sclerosis; +: positive; -: negative.

Supplementary Table S6: clinical and laboratory data of cHL/marginal zone composite lymphomas.

| References                                | Age (years) | Sex | History of lymphoma                                         | Location                         | Tumor size (cm) | B symptoms | Ann Arbor stage | Other symptoms or tumor mass/LN                                         | Laboratory data             | Extension assessment                                                                                                            | Treatment                                                                              | Outcome                                 | Follow-up duration (months) | Time of relapse / DOD (months) |
|-------------------------------------------|-------------|-----|-------------------------------------------------------------|----------------------------------|-----------------|------------|-----------------|-------------------------------------------------------------------------|-----------------------------|---------------------------------------------------------------------------------------------------------------------------------|----------------------------------------------------------------------------------------|-----------------------------------------|-----------------------------|--------------------------------|
| Harada <i>et al.</i> , 2008 [75]          | 63          | M   | No                                                          | Retroperitoneal LN and spleen    | Spleen: 980g    | No         | IV A            | Fatigue                                                                 | Anemia, LDH in normal range | CT-scan: Splenomegaly and retroperitoneal LN; BM+: SMZL                                                                         | COP x3, then EPOCH etoposide, vincristine, adriamycin, cyclophosphamide and prednisone | Dead of sepsis                          | NA                          | NA                             |
| Zettl <i>et al.</i> , 2005 (case 1) [76]  | 54          | M   | NA                                                          | Stomach, Perigastric LN          | NA              | No         | II              | Weight loss, "gastric tumour"                                           | NA                          | NA                                                                                                                              | Gastrectomy and CHOP x6                                                                | Complete response                       | 106                         | NA                             |
| Zettl <i>et al.</i> , 2005 (case 2) [76]  | 53          | M   | No                                                          | Stomach, Perigastric LN          | NA              | No         | II              | Weight loss, "gastric tumour"                                           | NA                          | NA                                                                                                                              | Gastrectomy and splenectomy and CHOP x6                                                | Complete response                       | 58                          | NA                             |
| Zettl <i>et al.</i> , 2005 (case 3) [76]  | 83          | M   | No                                                          | Stomach, Perigastric LN          | NA              | No         | II              | Weight loss, "gastric carcinoma"                                        | NA                          | NA                                                                                                                              | Gastrectomy (no chemotherapy due to bad general conditions)                            | NA                                      | 9                           | NA                             |
| Zettl <i>et al.</i> , 2005 (case 4) [76]  | 76          | M   | No                                                          | Stomach, Perigastric LN          | NA              | No         | II              | Weight loss, "gastric tumour"                                           | NA                          | NA                                                                                                                              | Gastrectomy and CHOP x4                                                                | Progressive disease and DOD at 7 months | 7                           | 7                              |
| Zettl <i>et al.</i> , 2005 (case 6) [76]  | 87          | M   | No                                                          | Stomach                          | NA              | No         | I               | Weight loss, malaise                                                    | NA                          | NA                                                                                                                              | Gastrectomy and 5xCOPP/ABVD                                                            | Partial response and DOD at 48 months   | 48                          | NA                             |
| Zettl <i>et al.</i> , 2005 (case 7) [76]  | 82          | F   | No                                                          | Stomach, Inguinal LN             | NA              | No         | III             | NA                                                                      | NA                          | NA                                                                                                                              | NA                                                                                     | NA                                      | NA                          | NA                             |
| Zettl <i>et al.</i> , 2005 (case 8) [76]  | 84          | M   | No                                                          | Stomach Cervical LN              | NA              | No         | III             | Weight loss, malaise                                                    | NA                          | NA                                                                                                                              | HP radication                                                                          | DOD (12 months)                         | 12                          | 12                             |
| Zettl <i>et al.</i> , 2005 (case 9) [76]  | 71          | M   | No                                                          | Bronchus                         | NA              | No         | III A           | Cough, weight loss, lung tumor, mediastinal and para-aortal lymph nodes | NA                          | NA                                                                                                                              | CHOP x6 and rituximab                                                                  | Complete response                       | 4                           | NA                             |
| Zettl <i>et al.</i> , 2005 (case 10) [76] | 58          | F   | No                                                          | Thyroid, cervical LN             | NA              | No         | III A           | Thyroid tumor                                                           | NA                          | NA                                                                                                                              | CHOP x6 and thyroidectomy                                                              | NA                                      | 2                           | NA                             |
| Zettl <i>et al.</i> , 2005 (case 11) [76] | 67          | F   | Lymphoplasma cytoïd immunocytoma in 1991, and DLBCL in 1998 | Cervical LN                      | NA              | No         | NA              | NA                                                                      | NA                          | NA                                                                                                                              | Splenectomy, 6xCHOP and bendamustine                                                   | DOD (8 months)                          | 8                           | 8                              |
| Zettl <i>et al.</i> , 2005 (case 12) [76] | 70          | M   | No                                                          | Inguinal LN                      | NA              | Yes        | III B           | Cervical, axillary, mediastinal, abdominal, inguinal LN, splenomegaly   | NA                          | NA                                                                                                                              | MCP HD9 x2 (German Hodgkin Study)                                                      | Partial remission and loss to follow-up | 6                           | NA                             |
| Elmahy <i>et al.</i> , 2007 [77]          | 64          | M   | No                                                          | Cervical and axillary LN, spleen | NA              | No         | IV A            | Abdominal pain and distension, night sweat                              | NA                          | CT-scan: extension to mesenteric, para-aortic LN, splenomegaly, moderate mediastinal LN and small axillary/pelvic LN; BM+: SMZL | ABVD x6 and then splenectomy                                                           | Complete remission                      | 6                           | NA                             |
| Oka <i>et al.</i> , 2012 [74]             | 60          | M   | MALTL 2 years earlier                                       | Stomach                          | 18              | No         | NA              | NA                                                                      | NA                          | BM aspiration -                                                                                                                 | Gastrectomy and CHOP x3                                                                | Complete remission                      | 131                         | 122*                           |
| Oka <i>et al.</i> , 2010 [78]             | 66          | F   | No                                                          | Lung, stomach, and brain         | 2               | No         | IV A            | Headaches and gait disturbance, cerebral tumor                          | NA                          | PET-scan: lung mass and systemic LN swelling                                                                                    | Gamma knife therapy x5, no chemotherapy, lung partial lobectomy                        | NA                                      | 86                          | 43                             |

|                                              |    |    |      |                                                |    |     |      |                                                                                                                                                                               |                                     |                                                                                                                |                                             |                                    |      |    |
|----------------------------------------------|----|----|------|------------------------------------------------|----|-----|------|-------------------------------------------------------------------------------------------------------------------------------------------------------------------------------|-------------------------------------|----------------------------------------------------------------------------------------------------------------|---------------------------------------------|------------------------------------|------|----|
| Fung <i>et al.</i> , 2002 [79]               | 78 | M  | No   | Mass of the left supraglottic larynx           | 3  | No  | I    | Intermittent shortness of breath, progressive dysphagia, and intermittent hoarseness since 3 months due to large mass of the left supraglottic larynx that had a “ball-valve” | NA                                  | NA                                                                                                             | RT                                          | Complete remission                 | 31.2 | NA |
| Aguilera <i>et al.</i> , 1996 [80]           | 74 | M  | No   | Small bowel tumor and LN                       | 9  | No  | NA   | Acute abdomen perforation, periombilical pain due to small bowel tumor                                                                                                        | NA                                  | NA                                                                                                             | No treatment                                | Dead from congestive heart failure | NA   | NA |
| Maeshima <i>et al.</i> , 2015 [3]            | 45 | M  | No   | Stomach, Paraaortic LN                         | NA | Na  | II   | NA                                                                                                                                                                            | NA                                  | NA                                                                                                             | R-CHOP                                      | Complete remission                 | 79   | NA |
| Demurtas <i>et al.</i> , 2011 (case 15) [60] | 58 | M  | NA   | Laterocervical LN                              | NA | Na  | NA   | NA                                                                                                                                                                            | NA                                  | NA                                                                                                             | NA                                          | NA                                 | NA   | NA |
| Schmitz <i>et al.</i> , 2005 (case 4) [6]    | NA | NA | SMZL | NA                                             | NA |     | NA   | NA                                                                                                                                                                            | NA                                  | NA                                                                                                             | NA                                          | NA                                 | NA   | NA |
| Auditeau <i>et al.</i> , 2018 [81]           | 70 | M  | No   | Hepato-splenomegaly, coeliac and mesenteric LN | NA | Yes | IV B | NA                                                                                                                                                                            | Anemia, neutrophilia, lymphocytosis | CT-scan: hepato-splenomegaly, coeliac and mesenteric LN<br>BM+: MZL and cHL;<br>BM aspiration +: DLBCL and cHL | COP, ABVD and etoposide and then R-CHOEP x3 | No remission and DOD               | NA   | NA |

BM+/-: Involvement or not on bone marrow biopsy; BM aspiration +/-: Involvement or not on bone marrow aspiration; cHL: classical Hodgkin lymphoma; CT-scan: computed tomography-scan; DLBCL: Diffuse large B-cell lymphoma; DOD: Dead of disease; F: Female; HP: *Helicobacter pylori*; LDH: Lactate dehydrogenase; LN: Lymph node(s); M: Male; MALTL: Mucosa-associated lymphoid tissue lymphoma; MZL: Marginal zone lymphoma; NA: Not available; PET-scan: Positron emission tomography-scan; RT: Radiotherapy; SMZL: Splenic marginal zone lymphoma. For chemotherapy abbreviations, please see **Supplementary Text S1**.

\*Not proved by histopathology (CT-scan only).



**Supplementary Table S7: histopathological and molecular data of cHL/marginal zone composite lymphomas.**

| References                                | cHL type | MZL type      | Separated / mixed contingents | Immunophenotype cHL                                                                                                                 | Immunophenotype MZL                                                                                                         | t(11;18) (cHL) | t(11;18) (MZL) | Clonal B rearrangements (cHL) | Clonal B rearrangements (MZL) | Other molecular alterations                                           |
|-------------------------------------------|----------|---------------|-------------------------------|-------------------------------------------------------------------------------------------------------------------------------------|-----------------------------------------------------------------------------------------------------------------------------|----------------|----------------|-------------------------------|-------------------------------|-----------------------------------------------------------------------|
| Harada <i>et al.</i> , 2008 [75]          | cHL      | SMZL          | Mixed                         | CD30+, CD15+ (weak), CD20-, PAX5+, CD45-, BOB1-, OCT2-                                                                              | CD20+, BCL2+, CD5-, CD30-, CD15-                                                                                            | NA             | NA             | NA                            | NA                            | On whole tissue sample: clonal rearrangement of <i>IgH</i>            |
| Zettl <i>et al.</i> , 2005 (case 1) [76]  | cHL-MC   | MALTL + DLBCL | Separated (synchronous)       | CD30+, CD15-, CD20-, CD79a-, $\kappa/\lambda$ light chains-, CD45-, BCL2+ (focal), EBER-, LMP1-, p53+, MUM1+                        | CD20+, CD45+, CD79a+, $\kappa/\lambda$ light chains-, BCL2+, p53-, CD30-, CD15-, EBER-, LMP1-, MUM1+ (focal)                | NA             | NA             | NA                            | NA                            | NA                                                                    |
| Zettl <i>et al.</i> , 2005 (case 2) [76]  | cHL-MC   | MALTL + DLBCL | Separated (synchronous)       | CD30+, CD15+ (focal), CD20+ (focal), CD79a-, $\kappa/\lambda$ light chains-, CD45-, BCL2-, EBER+, LMP1+, p53+, MUM1+                | CD20+, CD45+, CD79a+, $\kappa/\lambda$ light chains-, BCL2+, p53-, CD30-, CD15-, EBER-, LMP1-, MUM1-                        | NA             | NA             | NA                            | NA                            | NA                                                                    |
| Zettl <i>et al.</i> , 2005 (case 3) [76]  | cHL-MC   | MALTL + DLBCL | Separated (synchronous)       | CD30+, CD15+, CD20+ (focal), CD79a-, $\kappa/\lambda$ light chains-, CD45-, BCL2+, EBER-, LMP1-, p53+, MUM1+                        | CD20+, CD45+, CD79a+, $\kappa/\lambda$ light chains-, BCL2+, p53-, CD30-, CD15-, EBER-, LMP1-, MUM1-                        | NA             | NA             | NA                            | NA                            | NA                                                                    |
| Zettl <i>et al.</i> , 2005 (case 4) [76]  | cHL-MC   | MALTL + DLBCL | Separated (synchronous)       | CD30+, CD15-, CD20+, CD79a-, $\kappa/\lambda$ light chains-, CD45-, BCL2+, EBER+, LMP1+, p53+, MUM1+                                | CD20+, CD45+, CD79a+, $\kappa$ light chain+, $\lambda$ light chain-, BCL2+, p53-, CD30-, CD15-, EBER-, LMP1-, MUM1+ (focal) | NA             | NA             | NA                            | NA                            | NA                                                                    |
| Zettl <i>et al.</i> , 2005 (case 6) [76]  | cHL      | MALTL         | NA                            | CD30+, CD15+, CD20-, $\kappa/\lambda$ light chains-, CD45-, LMP1-                                                                   | CD20+, CD45+, $\kappa$ light chain+, $\lambda$ light chain-, CD30-, CD15-, EBER-, LMP1-                                     | NA             | -              | NA                            | NA                            | NA                                                                    |
| Zettl <i>et al.</i> , 2005 (case 7) [76]  | cHL-MC   | MALTL         | NA                            | CD30+, CD15+CCD20+, CD79a-, $\kappa/\lambda$ light chains-, CD45-, BCL2+, EBER-, LMP1-, p53+, MUM1+                                 | CD20+, CD45+, CD79a+, $\kappa$ light chain+, $\lambda$ light chain-, BCL2+, p53-, CD30-, CD15-, EBER-, LMP1-, MUM1+ (focal) | NA             | -              | NA                            | NA                            | NA                                                                    |
| Zettl <i>et al.</i> , 2005 (case 8) [76]  | cHL-MC   | MALTL         | NA                            | CD30+, CD15+, CD20-, $\kappa/\lambda$ light chains-, CD45-, EBER-, LMP1-                                                            | CD20+, CD45+, $\kappa/\lambda$ light chains-, CD30-, CD25-, EBER-, LMP1-                                                    | NA             | -              | NA                            | NA                            | NA                                                                    |
| Zettl <i>et al.</i> , 2005 (case 9) [76]  | cHL      | MALTL         | NA                            | CD30+, CD15-, CD20+ (focal), CD79a-, $\kappa/\lambda$ light chains-, CD45-, BCL2+, LMP1-                                            | CD20+, CD45+, CD79a+, $\kappa/\lambda$ light chains-, BCL2-, p53-, CD30-, CD15-, EBER-, LMP1-                               | NA             | -              | NA                            | NA                            | NA                                                                    |
| Zettl <i>et al.</i> , 2005 (case 10) [76] | cHL-MC   | MALTL + DLBCL | Separated (synchronous)       | CD30+, CD15+, CD20-, CD79a-, $\kappa/\lambda$ light chains-, CD45-, BCL2+, EBER+, LMP1+, p53+, MUM1+                                | CD20+, CD45+, CD79a+, $\kappa/\lambda$ light chains-, BCL2+, p53-, CD30-, CD15-, EBER-, LMP1-, MUM1-                        | NA             | NA             | NA                            | NA                            | NA                                                                    |
| Zettl <i>et al.</i> , 2005 (case 11) [76] | cHL-MC   | MZL           | NA                            | CD30+, CD15+ (focal), CD20+, CD79a-, $\kappa/\lambda$ light chains-, CD45-, BCL2+, EBER+, LMP1+, p53+, MUM1+                        | CD20+, CD45+, CD79a+, $\kappa$ light chain+, $\lambda$ light chain-, BCL2+, p53-, CD30-, CD15-, EBER-, LMP1-, MUM1+ (focal) | NA             | -              | NA                            | NA                            | NA                                                                    |
| Zettl <i>et al.</i> , 2005 (case 12) [76] | cHL-MC   | MZL           | NA                            | CD30+, CD15-, CD20+ (focal), CD79a-, $\kappa/\lambda$ light chains-, CD45-, BCL2+, EBER+, LMP1+                                     | CD20-, CD45-, CD79a+, $\kappa$ light chain-, $\lambda$ light chain+, BCL2+, CD30-, CD15-, EBER-, LMP1-                      | NA             | -              | NA                            | NA                            | NA                                                                    |
| Elmahy <i>et al.</i> , 2007 [77]          | cHL-MC   | SMZL          | NA                            | CD30+, CD15+                                                                                                                        | CD20+, $\kappa$ light chain+, CyclinD1-, IgD+, IgM+, CD5-                                                                   | NA             | NA             | NA                            | NA                            | NA                                                                    |
| Oka <i>et al.</i> , 2012 [74]             | cHL      | MALTL         | Mixed                         | CD30+, CD15+, CD20+ (focal/weak), PAX5-, CD79a+ (focal/weak), ALK1-, CD5-, CD3-, CyclinD1-, CD45-, EBER+, LMP1+, EMA-, BOB1-, OCT2- | CD20-, CD45-, CD79a-, CyclinD1-, CD5-, CD3-, CD30-, CD15-, EBER-, LMP1-, PAX5+, BOB1+, OCT2-                                | NA             | NA             | NA                            | NA                            | Bone marrow: Chromosome analysis: 47, XY, +der(17) t(1; 17)(q21; q25) |

|                                              |        |               |                         |                                                                |                                                                |    |    |                                                               |                                                               |                                                               |
|----------------------------------------------|--------|---------------|-------------------------|----------------------------------------------------------------|----------------------------------------------------------------|----|----|---------------------------------------------------------------|---------------------------------------------------------------|---------------------------------------------------------------|
| Oka <i>et al.</i> , 2010 [78]                | cHL-NS | MALTL         | Separated (synchronous) | CD30+, CD15+, CD20+, CD79a-, CD45-, EBER+, LMP1+, BOB1-, OCT2- | CD20+, CD79a+, CD3-, CD30-, CD15-, EBER+                       | NA | NA | NA                                                            | NA                                                            | NA                                                            |
| Fung <i>et al.</i> , 2002 [79]               | cHL    | MALTL         | Mixed                   | CD30+, CD15+, CD20+ (focal), CD45-, LMP1-                      | CD20+, CD45+, CD79a+, BCL2+ (focal)                            | NA | NA | NA                                                            | NA                                                            | NA                                                            |
| Aguilera <i>et al.</i> , 1996 [80]           | cHL-MC | MZL           | Separated               | CD30+, CD15+, CD20-, CD45-, LMP1+                              | CD20+, CD45+, $\kappa/\lambda$ light chains not helpful, LMP1+ | NA | NA | NA                                                            | NA                                                            | NA                                                            |
| Maeshima <i>et al.</i> , 2015 [3]            | cHL-MC | MALTL + DLBCL | Separated (synchronous) | CD30+, CD15-, CD20-, PAX5+, CD79a-, EBER-, BOB1-, OCT2-        | CD20+, CD10-, CD5-CD30+ (focal), EBER-                         | -  | -  | NA                                                            | NA                                                            | No <i>BCL2</i> translocation in both contingents              |
| Demurtas <i>et al.</i> , 2011 (case 15) [60] | cHL    | MZL           | NA                      | NA                                                             | CD10-, CD5-, CD23- (cytometry)                                 | NA | NA | NA                                                            | NA                                                            | On whole tissue sample: clonal rearrangement of <i>IgH</i>    |
| Schmitz <i>et al.</i> , 2005 (case 4) [6]    | cHL    | SMZL          | Separated (synchronous) | NA                                                             | NA                                                             | NA | NA | Absence of <i>IgH</i> rearrangement or <i>V</i> gene mutation | Absence of <i>IgH</i> rearrangement or <i>V</i> gene mutation | Absence of <i>FAS</i> , <i>NFKB1A</i> and <i>ATM</i> mutation |
| Auditeau <i>et al.</i> , 2018 [81]           | cHL    | DLBCL and MZL | NA                      | CD30+, CD15+, CD20-, CD79a-, ALK1-, CD5-, CD3-,                | CD20+, CD10-, CD5- (cytometry)                                 | NA | NA | NA                                                            | NA                                                            | NA                                                            |

cHL: classical Hodgkin lymphoma; DLBCL: Diffuse large B-cell lymphoma; EBER: Epstein-Barr virus-encoded small RNA *in situ* hybridization; MALTL: Mucosa-associated lymphoid tissue lymphoma; MC: Mixed cellularity; MZL: Marginal zone lymphoma; NA: Not available; NS: Nodular sclerosis; SMZL: Splenic marginal zone lymphoma; +: positive; -: negative.

Supplementary Table S8: clinical and laboratory data of cHL/DLBCL composite lymphomas.

| References                                                                             | Age (years) | Sex | History of lymphoma                       | Location                                         | Tumor size (cm) | B symptoms | Ann Arbor stage | Other symptoms or tumor mass/LN | Laboratory data                | Extension assessment                                                                     | Treatment                                              | Outcome                                                                           | Follow-up duration (months) | Time of relapse / DOD (months) |
|----------------------------------------------------------------------------------------|-------------|-----|-------------------------------------------|--------------------------------------------------|-----------------|------------|-----------------|---------------------------------|--------------------------------|------------------------------------------------------------------------------------------|--------------------------------------------------------|-----------------------------------------------------------------------------------|-----------------------------|--------------------------------|
| Gonzales <i>et al.</i> , 1991 (case 1) [14], Kingma <i>et al.</i> , 1994 (case 1) [66] | 66          | M   | No                                        | Cervical LN                                      | NA              | No         | IV A            | NA                              | NA                             | NA                                                                                       | Cyclophosphamide, vincristine, bleomycin               | NA                                                                                | NA                          | NA                             |
| Gonzales <i>et al.</i> , 1991 (case 2) [14], Kingma <i>et al.</i> , 1994 (case 2) [66] | 43          | M   | DLBCL 6 years earlier, FL 4 years earlier | Inguinal and supraclavicular LN                  | NA              | No         | NA              | NA                              | NA                             | NA                                                                                       | Multiagent chemotherapy and ASCT                       | DOD 26 months after the diagnosis                                                 | 26                          | 26                             |
| Gonzales <i>et al.</i> , 1991 (case 3) [14], Kingma <i>et al.</i> , 1994 (case 3) [66] | 63          | M   | FL 3 years earlier                        | Stomach                                          | NA              | No         | NA              | NA                              | NA                             | NA                                                                                       | Surgery only                                           | DOD 2 months after diagnosis                                                      | 2                           | 2                              |
| Gonzales <i>et al.</i> , 1991 (case 4) [14]                                            | 62          | F   | No                                        | Inguinal LN                                      | NA              | No         | I A             | NA                              | NA                             | NA                                                                                       | Local RT                                               | Complete remission                                                                | 27                          | NA                             |
| Gonzales <i>et al.</i> , 1991 (case 5) [14], Kingma <i>et al.</i> , 1994 (case 4) [66] | 22          | M   | No                                        | Cervical LN                                      | NA              | Yes        | IV B            | NA                              | NA                             | NA                                                                                       | Cyclophosphamide, cisplatinium, prednisone, carmustine | DOD 6 months after diagnosis                                                      | 6                           | 6                              |
| Gonzales <i>et al.</i> , 1991 (case 7) [14], Kingma <i>et al.</i> , 1994 (case 6) [66] | 25          | M   | No                                        | Mediastinum                                      | NA              | No         | II A            | NA                              | NA                             | NA                                                                                       | Multiagent chemotherapy                                | Complete remission                                                                | 3                           | NA                             |
| Kingma <i>et al.</i> , 1994 (case 5) [66]                                              | 84          | F   | No                                        | Cervical LN                                      | NA              | NA         | NA              | NA                              | NA                             | NA                                                                                       | NA                                                     | NA                                                                                | NA                          | NA                             |
| Kingma <i>et al.</i> , 1994 (case 9) [66]                                              | 70          | F   | No                                        | Inguinal LN                                      | NA              | NA         | NA              | NA                              | NA                             | NA                                                                                       | NA                                                     | NA                                                                                | NA                          | NA                             |
| Kingma <i>et al.</i> , 1994 (case 10) [66]                                             | 63          | M   | No                                        | LN (unspecified)                                 | NA              | NA         | NA              | NA                              | NA                             | NA                                                                                       | NA                                                     | NA                                                                                | NA                          | NA                             |
| Kingma <i>et al.</i> , 1994 (case 11) [66]                                             | 58          | M   | No                                        | Cervical LN                                      | NA              | NA         | NA              | NA                              | NA                             | NA                                                                                       | NA                                                     | NA                                                                                | NA                          | NA                             |
| Kingma <i>et al.</i> , 1994 (case 12) [66]                                             | 66          | F   | No                                        | Axillary LN                                      | NA              | NA         | NA              | NA                              | NA                             | NA                                                                                       | NA                                                     | NA                                                                                | NA                          | NA                             |
| Kingma <i>et al.</i> , 1994 (case 1*) [66]                                             | 76          | F   | No                                        | LN (unspecified) and small intestine             | NA              | NA         | NA              | NA                              | NA                             | NA                                                                                       | NA                                                     | NA                                                                                | NA                          | NA                             |
| Kingma <i>et al.</i> , 1994 (case 2*) [66]                                             | 16          | F   | No                                        | Cervical LN and ovary                            | NA              | NA         | NA              | NA                              | NA                             | NA                                                                                       | NA                                                     | NA                                                                                | NA                          | NA                             |
| Nishioka <i>et al.</i> , 2018 [64]                                                     | 73          | F   | No                                        | Systemic LN and ulcerative mass of the esophagus | 1,5             | Yes        | IV B            | NA                              | Soluble IL-2R and LDH increase | PET-scan: cervical, axillary, mediastinal, supraclavicular, para-aortic, and inguinal LN | 8x R-CHOP, and DeVIC x4 for the relapse                | Complete remission, then, relapse (1 month later on cHL), then complete remission | 1                           | 1                              |

|                                              |    |    |    |                                                                                          |    |     |        |                                                                                            |                                       |                                                                                                                                              |                                                             |                                         |     |    |
|----------------------------------------------|----|----|----|------------------------------------------------------------------------------------------|----|-----|--------|--------------------------------------------------------------------------------------------|---------------------------------------|----------------------------------------------------------------------------------------------------------------------------------------------|-------------------------------------------------------------|-----------------------------------------|-----|----|
|                                              |    |    |    |                                                                                          |    |     |        |                                                                                            |                                       | Esophagogastrroduodenoscopy: ulcerative mass in the mid-esophagus; BM+ ( <i>IgH</i> rearrangement identified, whitout tumor cell vizualised) |                                                             |                                         |     |    |
| Zettl <i>et al.</i> , 2005 (case 1) [76]     | 54 | M  | No | Stomach and perigastric LN                                                               | NA | No  | II E   | Weight loss, gastric tumor                                                                 | NA                                    | NA                                                                                                                                           | Gastrectomy and CHOP x6                                     | Complete response                       | 106 | NA |
| Zettl <i>et al.</i> , 2005 (case 2) [76]     | 53 | M  | No | Stomach and perigastric LN                                                               | NA | No  | II E   | Weight loss, gastric tumor                                                                 | NA                                    | NA                                                                                                                                           | Gastrectomy and splenectomy and CHOP x6                     | Complete response                       | 58  | NA |
| Zettl <i>et al.</i> , 2005 (case 3) [76]     | 83 | M  | No | Stomach and perigastric LN                                                               | NA | No  | II E   | Weight loss, gastric tumor                                                                 | NA                                    | NA                                                                                                                                           | Gastrectomy (no chemotherapy due to bad general conditions) | NA                                      | 9   | NA |
| Zettl <i>et al.</i> , 2005 (case 4) [76]     | 76 | M  | No | Stomach and perigastric LN                                                               | NA | No  | II E   | Weight loss, gastric tumor                                                                 | NA                                    | NA                                                                                                                                           |                                                             | Progressive disease and DOD at 7 months | 7   | 7  |
| Zettl <i>et al.</i> , 2005 (case 5) [76]     | 73 | F  | No | Stomach and perigastric LN                                                               | NA | No  | II E   | NA                                                                                         | NA                                    | NA                                                                                                                                           | NA                                                          | NA                                      | NA  | NA |
| Zettl <i>et al.</i> , 2005 (case 10) [76]    | 58 | F  | No | Thyroid and cervical LN                                                                  | NA | No  | II A E | Thyroid tumor                                                                              | NA                                    | NA                                                                                                                                           | CHOP x6 and thyroidectomy                                   | NA                                      | 2   | NA |
| Geladari <i>et al.</i> , 2020 [82]           | 73 | F  | NA | Cervical, axillary, hepato-gastric, pancreaticoduodenal and paraaortic LN, splenomegaly, | NA | Yes | III B  | Abdominal fullness and icterus since 2 days with pain after meals. Pruritus since 2 months | Liver and cholestatic enzyme increase | NA                                                                                                                                           | NA                                                          | NA                                      | NA  | NA |
| Schmitz <i>et al.</i> , 2005 (case 6) [6]    | NA | NA | NA | NA                                                                                       | NA | NA  | NA     | NA                                                                                         | NA                                    | NA                                                                                                                                           | NA                                                          | NA                                      | NA  | NA |
| Maeshima <i>et al.</i> , 2015 [3]            | 45 | M  | No | Stomach Paraaortic LN                                                                    | NA | NA  | II     | NA                                                                                         | NA                                    | NA                                                                                                                                           | R-CHOP                                                      | Complete remission                      | 79  | NA |
| Aussedat <i>et al.</i> , 2020 (Com-22) [16]  | NA | NA | NA | Supraclavicular LN                                                                       | NA | NA  | NA     | NA                                                                                         | NA                                    | NA                                                                                                                                           | R-ACVBP, MTX, R-DHAOx, IVOX, ASCT, RT                       | NA                                      | NA  | NA |
| Aussedat <i>et al.</i> , 2020 (Com-101) [16] | NA | NA | NA | Cervical LN                                                                              | NA | NA  | NA     | NA                                                                                         | NA                                    | NA                                                                                                                                           | DLBCLR-CHOP                                                 | NA                                      | NA  | NA |
| Aussedat <i>et al.</i> , 2020 (Com-158) [16] | NA | NA | NA | Tonsil and mesenteric LN                                                                 | NA | NA  | NA     | NA                                                                                         | NA                                    | NA                                                                                                                                           | R-CHOP, R-ABVD                                              | NA                                      | NA  | NA |
| Aussedat <i>et al.</i> , 2020 (Com-219) [16] | NA | NA | NA | Mediastinum                                                                              | NA | NA  | NA     | NA                                                                                         | NA                                    | NA                                                                                                                                           | DLBCL R-COPADM, CYM                                         | NA                                      | NA  | NA |
| Aussedat <i>et al.</i> , 2020 (Com-236) [16] | NA | NA | NA | Subcutaneous                                                                             | NA | NA  | NA     | NA                                                                                         | NA                                    | NA                                                                                                                                           | escBEACOPP                                                  | NA                                      | NA  | NA |
| Aussedat <i>et al.</i> , 2020 (Com-240) [16] | NA | NA | NA | Supraclavicular LN, stomach and mediastinum                                              | NA | NA  | NA     | NA                                                                                         | NA                                    | NA                                                                                                                                           | R-ACVBP                                                     | NA                                      | NA  | NA |

|                                                     |    |    |    |                                                 |    |     |      |                             |    |          |                       |                    |    |    |
|-----------------------------------------------------|----|----|----|-------------------------------------------------|----|-----|------|-----------------------------|----|----------|-----------------------|--------------------|----|----|
| Aussedat <i>et al.</i> , 2020 (Com-251) [16]        | NA | NA | NA | Inguinal LN                                     | NA | NA  | NA   | NA                          | NA | NA       | R-CHOP                | NA                 | NA | NA |
| Aussedat <i>et al.</i> , 2020 (Com-253) [16]        | NA | NA | NA | Mediastinum                                     | NA | NA  | NA   | NA                          | NA | NA       | R-COPADM, CYM         | NA                 | NA | NA |
| Aussedat <i>et al.</i> , 2020 (Com-312) [16]        | NA | NA | NA | Mediastinum                                     | NA | NA  | NA   | NA                          | NA | NA       | R-ACVBP, BV-ICE, ASCT | NA                 | NA | NA |
| Wilson <i>et al.</i> , 2014 [83]                    | NA | NA | NA | NA                                              | NA | NA  | NA   | NA                          | NA | NA       | NA                    | NA                 | NA | NA |
| Bellan <i>et al.</i> , 2002 [84]                    | 29 | F  | No | Cervical, supraclavicular LN                    | NA | No  | NA   | No                          | NA | NA       | MACOP-B and ASCT, RT  | Complete remission | 30 | NA |
| Rosenquist <i>et al.</i> , 2004 [13]                | 74 | M  | No | Retroperitoneal mass and abdominal, inguinal LN | 12 | Yes | IV B | No                          | NA | BM+: cHL | R-CHOP                | Complete remission | 12 | NA |
| Wei <i>et al.</i> , 2004 [85]                       | 26 | F  | No | Mediastinal                                     | NA | NA  | NA   | Chest pain and night sweats | NA | BM-      | R-CHOP et RT          | NA                 | NA | NA |
| Traverse-Glehen <i>et al.</i> , 2005 (case 22) [86] | 46 | M  | NA | Mediastinum                                     | NA | NA  | NA   | NA                          | NA | NA       | NA                    | NA                 | NA | NA |
| Traverse-Glehen <i>et al.</i> , 2005 (case 23) [86] | 25 | M  | NA | Mediastinum and liver                           | NA | NA  | NA   | NA                          | NA | NA       | NA                    | NA                 | NA | NA |
| Traverse-Glehen <i>et al.</i> , 2005 (case 24) [85] | 25 | M  | NA | Mediastinum                                     | NA | NA  | NA   | NA                          | NA | NA       | NA                    | NA                 | NA | NA |
| Traverse-Glehen <i>et al.</i> , 2005 (case 25) [86] | 31 | F  | NA | Mediastinum                                     | NA | NA  | NA   | NA                          | NA | NA       | NA                    | NA                 | NA | NA |
| Traverse-Glehen <i>et al.</i> , 2005 (case 26) [86] | 21 | M  | NA | Mediastinum                                     | NA | NA  | NA   | NA                          | NA | NA       | NA                    | NA                 | NA | NA |
| Traverse-Glehen <i>et al.</i> , 2005 (case 27) [86] | 40 | M  | NA | Mediastinum and cervical LN                     | NA | NA  | NA   | NA                          | NA | NA       | NA                    | NA                 | NA | NA |
| Quintanilla-Martinez <i>et al.</i> , 2009 [87]      | NA | F  | NA | Mediastinum                                     | NA | NA  | NA   | NA                          | NA | NA       | NA                    | NA                 | NA | NA |
| Quintanilla-Martinez <i>et al.</i> , 2009 [87]      | NA | F  | NA | Mediastinum                                     | NA | NA  | NA   | NA                          | NA | NA       | NA                    | NA                 | NA | NA |
| Quintanilla-Martinez <i>et al.</i> , 2009 [87]      | NA | F  | NA | Mediastinum                                     | NA | NA  | NA   | NA                          | NA | NA       | NA                    | NA                 | NA | NA |
| Quintanilla-Martinez <i>et al.</i> , 2009 [87]      | NA | F  | NA | Mediastinum                                     | NA | NA  | NA   | NA                          | NA | NA       | NA                    | NA                 | NA | NA |

|                                          |    |    |                                                   |                                                                                   |             |     |      |                                                                                                       |                                               |                                                                                                                                                       |                                                                                              |                                                                                                              |      |    |
|------------------------------------------|----|----|---------------------------------------------------|-----------------------------------------------------------------------------------|-------------|-----|------|-------------------------------------------------------------------------------------------------------|-----------------------------------------------|-------------------------------------------------------------------------------------------------------------------------------------------------------|----------------------------------------------------------------------------------------------|--------------------------------------------------------------------------------------------------------------|------|----|
| Oschlies <i>et al.</i> , 2011 [88]       | NA | NA | NA                                                | NA                                                                                | NA          | NA  | NA   | NA                                                                                                    | NA                                            | NA                                                                                                                                                    | NA                                                                                           | NA                                                                                                           | NA   | NA |
| Eberle <i>et al.</i> , 2011 [89]         | 23 | M  | NA                                                | NA                                                                                | NA          | NA  | NA   | NA                                                                                                    | NA                                            | NA                                                                                                                                                    | NA                                                                                           | NA                                                                                                           | NA   | NA |
| Yu <i>et al.</i> , 2011 [90]             | 37 | F  | No                                                | Bilateral supraclavicular LN                                                      | 7           | No  | NA   | Shoulder and chest pain since 3 months                                                                | Anemia, tumor specific growth factor increase | Abdominal ultrasonography: no abnormalities                                                                                                           | R-CHOP x6 and RT                                                                             | Complete remission                                                                                           | 33   | NA |
| Wang <i>et al.</i> , 2013 [91]           | 53 | F  | No                                                | Gastric ulcers (pylorus and corpus), and perigastric, parapyloric LN              | 2.5 to 4    | No  | VI A | Upper abdominal discomfort and flatulent pain since 8 months, weight loss and anorexia since 6 months | Anemia                                        | Gastroscopy: 2 ulcers of the gastric corpus and mucosal nodularities; CT-scan : no other LN                                                           | CHOP x8 and R-CHOP x2 after relapse                                                          | Relapse (unspecified) 7 months after chemotherapy, DOD at 11 months                                          | 11   | 7  |
| Khan <i>et al.</i> , 2017 [92]           | 18 | F  | No                                                | Right pulmonary mass with liver lesions and multiple small masses in both kidneys | 14          | No  | VI A | Syncopes, swelling of neck and face since 3 weeks (superior vena cava syndrome)                       | Anemia, LDH increase                          | BM-                                                                                                                                                   | EPOCH-R x8 and intrathecal methotrexate                                                      | Complete remission                                                                                           | NA   | NA |
| Goyal <i>et al.</i> , 2016 [93]          | 79 | F  | NA                                                | Ileum mass and right colon mass and mesenteric LN                                 | 11 and 0,8  | NA  | NA   | NA                                                                                                    | NA                                            | NA                                                                                                                                                    | R-CHOP x6                                                                                    | Complete remission                                                                                           | 6    | NA |
| Khanna <i>et al.</i> , 2010 [94]         | 58 | M  | DLBCL 3 years earlier                             | Spleen, splenic hilar/peripancreatic LN, mitral and aortic valve masses           | 1.1 and 2.2 | No  | VI A | NA                                                                                                    | NA                                            | PET-scan: lesion of the spleen and splenic hilar LN; Echocardiography: mass of the mitral and aortic valves                                           | Cardiac surgery and R-CHOEP x6, bleomycin, methotrexate, cytarabine                          | Complete remission                                                                                           | 7    | NA |
| Auditeau <i>et al.</i> , 2018 [81]       | 70 | M  | No                                                | Hepato-splenomegaly, coeliac and mesenteric LN                                    | NA          | Yes | IV B | NA                                                                                                    | Anemia, neutrophilia, lymphocytosis           | Ct scan : hepato-splenomegaly, coeliac and mesenteric LN<br>BM+: MZL and cHL;<br>BM aspiration +: DLBCL and cHL                                       | COP, ABVD, etoposide and then R-CHOEP x3                                                     | No remission and DOD                                                                                         | NA   | NA |
| Casey <i>et al.</i> , 1990 (case 1) [95] | 27 | M  | No                                                | Mediastinum                                                                       | NA          | NA  | NA   | NA                                                                                                    | NA                                            | NA                                                                                                                                                    | NA                                                                                           | NA                                                                                                           | NA   | NA |
| Casey <i>et al.</i> , 1990 (case 8) [95] | 64 | M  | No                                                | Mesenteric LN and liver/spleen                                                    | NA          | NA  | IV   | NA                                                                                                    | NA                                            | NA                                                                                                                                                    | NA                                                                                           | NA                                                                                                           | NA   | NA |
| Guarner <i>et al.</i> , 1990 [96]        | 44 | M  | No (HIV+)                                         | Cervical, axillary, periaortic, retroperitoneal LN and liver/spleen               | 1           | No  | IV A | Fever (40°) and chills, severe diarrhea                                                               |                                               | BM: multiple non-caseating granulomas                                                                                                                 | ProMACE/MOPP                                                                                 | Dead of gastrointestinal hemorrhage and bacteremia after 6 months, invasive aspergillosis, and CMV infection | NA   | NA |
| Huang <i>et al.</i> , 2006 [97]          | 56 | M  | cHL-NS, 12 years earlier, relapse 9 years earlier | Generalized LN                                                                    | 4           | Yes | IV B | No                                                                                                    | NA                                            | CT-scan: multiple pulmonary nodules, hepatic lesions, mediastinal, porta hepatis, retroperitoneal and mesenteric LN, small intestine tumor; BM+ (cHL) | Dead of sepsis, acute renal failure, liver failure, coagulopathy 20 days after the admission | NA                                                                                                           | 0.67 | NA |

|                                             |    |    |                                                           |                                                                                                                                         |             |     |         |                                                    |                                                                                                           |                                                                                                                                                                                                                                         |                                                                                                                                                        |                                                                                                                                                                 |       |      |
|---------------------------------------------|----|----|-----------------------------------------------------------|-----------------------------------------------------------------------------------------------------------------------------------------|-------------|-----|---------|----------------------------------------------------|-----------------------------------------------------------------------------------------------------------|-----------------------------------------------------------------------------------------------------------------------------------------------------------------------------------------------------------------------------------------|--------------------------------------------------------------------------------------------------------------------------------------------------------|-----------------------------------------------------------------------------------------------------------------------------------------------------------------|-------|------|
| Wang <i>et al.</i> , 2020 [98]              | 64 | M  | No                                                        | Cervical LN (bilateral)                                                                                                                 | 2.5         | No  | II A    | No                                                 | NA                                                                                                        | NA                                                                                                                                                                                                                                      | R-CHOP x6 and R in maintenance therapy                                                                                                                 | Complete remission                                                                                                                                              | 6     | NA   |
| Kerl <i>et al.</i> , 1999 [99]              | 66 | NA | NA                                                        | Lung                                                                                                                                    | NA          | NA  | NA      | NA                                                 | NA                                                                                                        | NA                                                                                                                                                                                                                                      | NA                                                                                                                                                     | NA                                                                                                                                                              | NA    | NA   |
| Perwein <i>et al.</i> , 2020 (case 4) [100] | 14 | F  | No                                                        | Mediastinal, cervical and infraclavicular LN, pleural and pericardial effusion, chest wall, pulmonary, hepatic, pancreatic involvements |             | No  | III A E | Thoracic pain, tachycardia                         | LDH in normal range                                                                                       | NA                                                                                                                                                                                                                                      | Dose adjusted-EPOCH-R x6 and for relapse IEP x2 + COPDAC x2 + brentuximab x2, HD-BEAM + ASCT                                                           | Complete remission for 3.9 years and then relapse (cHL) and then complete remission after second line chemotherapy                                              | 88.8  | 46.8 |
| Perwein <i>et al.</i> , 2020 (case 1) [100] | 17 | F  | No                                                        | Mediastinal, cervical, supraclavicular, abdominal LN                                                                                    | NA          | No  | III A   | Neck and face swollen, superior vena cava syndrome | LDH increase, hyperleucocytosis                                                                           | NA                                                                                                                                                                                                                                      | BFM 04 protocol and RT for first line, and R + Hodgkin-like therapy but partial remission; For second line: DXM+BEAM and R-COP x2, HD-BEAM + ASCT + RT | Complete remission but relapse (cHL), and complete remission after second line therapy                                                                          | 124.8 | 5    |
| Miyagaki <i>et al.</i> , 2019 [101]         | 75 | M  | cHL 13 years earlier and mycosis fungoid 11 years earlier | Subcutaneous abdominal mass and aortic bifurcation / inguinal LN                                                                        | 3.5         | Yes | II B    | No                                                 | NA                                                                                                        | NA                                                                                                                                                                                                                                      | R-CHOP                                                                                                                                                 | NA                                                                                                                                                              | 36    | NA   |
| Paulli <i>et al.</i> , 1992 [102]           | 37 | M  | No                                                        | Supraclavicular, mediastinal and abdominal LN                                                                                           | NA          | No  | IV A    | Fever and malaise since 4 weeks                    | Anemia, elevation of $\alpha$ -2 globulin, low serum albumin, LDH in normal range                         | BM+: cHL                                                                                                                                                                                                                                | pro-MACE-CytaBOM x8                                                                                                                                    | Complete remission                                                                                                                                              | 23    | NA   |
| Hwang <i>et al.</i> , 2011 [103]            | 58 | M  | NA                                                        | Multiple LN and splenomegaly                                                                                                            | 15 (spleen) | Yes | IV B    | No                                                 | Anemia, circulating EBV DNA                                                                               | BM+: DLBCL                                                                                                                                                                                                                              | R-ABVD, intrathecal methotrexate after central nervous system relapse                                                                                  | Complete remission after 3 courses of treatment but isolated central nervous system lymphoma relapse (DLBCL, EBV DNA in cerebrospinal fluid) and died of sepsis | NA    | NA   |
| Hell <i>et al.</i> , 1995 (case 3) [104]    | NA | NA | NA                                                        | LN                                                                                                                                      | NA          | NA  | NA      | NA                                                 | NA                                                                                                        | NA                                                                                                                                                                                                                                      | NA                                                                                                                                                     | NA                                                                                                                                                              | NA    | NA   |
| Hell <i>et al.</i> , 1995 (case 6) [104]    | NA | NA | NA                                                        | LN                                                                                                                                      | NA          | NA  | NA      | NA                                                 | NA                                                                                                        | NA                                                                                                                                                                                                                                      | NA                                                                                                                                                     | NA                                                                                                                                                              | NA    | NA   |
| Soliman <i>et al.</i> , 2016 [105]          | 60 | F  | No                                                        | Cervical LN and hepato-splenomegaly                                                                                                     | NA          | Yes | IV B    | Fatigue, bilateral lower limb pain                 | LDH increase, low albuminal rate, hepatic cytolysis, elevated alkaline phosphatase, seric EBV DNA, Anemia | BM aspiration on biopsy+: Burkitt lymphoma/leukemia (27%); MRI: involvement of skull base and axial skeleton; PET-scan: cervical, supraclavicular, mediastinal, retroperitoneal, multiple liver/spleen and skeletal muscle lymphomatous | R-CONDOX-M/R-IVAC (intrathecal) + RT + R x2                                                                                                            | Complete remission                                                                                                                                              | NA    | NA   |

|                                           |    |   |    |                                                             |               |    |    |    |    | lesions, multiple pleural, peritoneal, extensive gastric and sporadic bowel involvement, multiple bone, bilateral breast and right adrenal foci involvement |                     |                                                          |    |    |  |
|-------------------------------------------|----|---|----|-------------------------------------------------------------|---------------|----|----|----|----|-------------------------------------------------------------------------------------------------------------------------------------------------------------|---------------------|----------------------------------------------------------|----|----|--|
| Kim <i>et al.</i> , 1977 (case 18) [1]    | 40 | M | NA | Spleen, splenic hilar, axillary, hepatoduodenal LN (CHL-NS) | Spleen : 866g | NA | NA | NA | NA | NA                                                                                                                                                          | Chemotherapy and RT | Complete remission but DOD 54 months after the diagnosis | 54 | 54 |  |
| Jaffe <i>et al.</i> , 1992 (case 3) [58]  | 43 | M | No | Inguinal and supraclavicular LN                             | NA            | NA | NA | NA | NA | NA                                                                                                                                                          | NA                  | NA                                                       | NA | NA |  |
| Jaffe <i>et al.</i> , 1992 (case 6) [58]  | 25 | M | No | Mediastinum                                                 | NA            | NA | NA | NA | NA | NA                                                                                                                                                          | NA                  | NA                                                       | NA | NA |  |
| Jaffe <i>et al.</i> , 1992 (case 7) [58]  | 63 | M | No | Stomach                                                     | NA            | NA | NA | NA | NA | NA                                                                                                                                                          | NA                  | NA                                                       | NA | NA |  |
| Jaffe <i>et al.</i> , 1992 (case 8) [58]  | 66 | M | No | Cervical LN                                                 | NA            | NA | NA | NA | NA | NA                                                                                                                                                          | NA                  | NA                                                       | NA | NA |  |
| Jaffe <i>et al.</i> , 1992 (case 9) [58]  | 22 | M | No | Cervical LN                                                 | NA            | NA | NA | NA | NA | NA                                                                                                                                                          | NA                  | NA                                                       | NA | NA |  |
| Jaffe <i>et al.</i> , 1992 (case 10) [58] | 73 | M | No | Inguinal LN                                                 | NA            | NA | NA | NA | NA | NA                                                                                                                                                          | NA                  | NA                                                       | NA | NA |  |
| Jaffe <i>et al.</i> , 1992 (case 11) [58] | 70 | M | No | Inguinal LN                                                 | NA            | NA | NA | NA | NA | NA                                                                                                                                                          | NA                  | NA                                                       | NA | NA |  |
| Jaffe <i>et al.</i> , 1992 (case 12) [58] | 63 | M | No | LN (unspecified)                                            | NA            | NA | NA | NA | NA | NA                                                                                                                                                          | NA                  | NA                                                       | NA | NA |  |
| Jaffe <i>et al.</i> , 1992 (case 14) [58] | 76 | F | No | Small bowel and mesenteric LN                               | NA            | NA | NA | NA | NA | NA                                                                                                                                                          | NA                  | NA                                                       | NA | NA |  |
| Jaffe <i>et al.</i> , 1992 (case 15) [58] | 16 | F | No | Ovary LN and spleen                                         | NA            | NA | NA | NA | NA | NA                                                                                                                                                          | NA                  | NA                                                       | NA | NA |  |

BM+/-: Involvement or not on bone marrow biopsy; BM aspiration +/-: Involvement or not on bone marrow aspiration; cHL: classical Hodgkin lymphoma; CT-scan: computed tomography-scan; DLBCL: Diffuse large B-cell lymphoma; DNA: Deoxyribonucleic acid; DOD: Dead of disease; EBV: Epstein-Barr Virus; F: Female; FL: Follicular lymphoma; HIV: Human immunodeficiency virus; IL-2R: Interleukine 2 receptor; LDH: Lactate dehydrogenase; LN: Lymph node(s); M: Male; NA: Not available; NS: Nodular sclerosis; PET-scan: Positron emission tomography-scan; RT: Radiotherapy. For chemotherapy abbreviations, please see **Supplementary Text S1**.

\*Case from the study of Kingma et al., 1994 [65] in the synchronous/simultaneous lymphomas table.



**Supplementary Table S9: histopathological and molecular data of cHL/DLBCL composite lymphomas.**

| References                                                                             | cHL type | DLBCL type | Separated / mixed contingents** | Immunophenotype cHL                                                                                          | Immunophenotype DLBCL                                                              | Clonal B rearrangements (cHL)   | Clonal B rearrangements (DLBCL)                       | Other molecular alterations                                                                                |
|----------------------------------------------------------------------------------------|----------|------------|---------------------------------|--------------------------------------------------------------------------------------------------------------|------------------------------------------------------------------------------------|---------------------------------|-------------------------------------------------------|------------------------------------------------------------------------------------------------------------|
| Gonzales <i>et al.</i> , 1991 (case 1) [14], Kingma <i>et al.</i> , 1994 (case 1) [66] | cHL-NS   | DLBCL      | NA (DLBCL, 75%)                 | CD15+, CD20-, CD45-, UCHL1-, EBER-                                                                           | CD20+, CD45+, UCHL1-, CD15-, EBER-                                                 | NA                              | NA                                                    | NA                                                                                                         |
| Gonzales <i>et al.</i> , 1991 (case 2) [14], Kingma <i>et al.</i> , 1994 (case 2) [66] | cHL-NS   | DLBCL      | NA (DLBCL, 90%)                 | CD15+, CD20-, CD45-, UCHL1-, EBER-                                                                           | CD20+, CD45+, UCHL1-, CD15-, EBER-                                                 | NA                              | NA                                                    | NA                                                                                                         |
| Gonzales <i>et al.</i> , 1991 (case 3) [14], Kingma <i>et al.</i> , 1994 (case 3) [66] | cHL-MC   | DLBCL      | NA (DLBCL, 90%)                 | CD15+, CD20-, CD45-, UCHL1-, EBER+                                                                           | CD20+, CD45+, UCHL1-, CD15-, EBER+                                                 | NA                              | NA                                                    | NA                                                                                                         |
| Gonzales <i>et al.</i> , 1991 (case 4) [14]                                            | cHL-NS   | DLBCL      | NA, equal quantity              | NA                                                                                                           | NA                                                                                 | NA                              | NA                                                    | NA                                                                                                         |
| Gonzales <i>et al.</i> , 1991 (case 5) [14], Kingma <i>et al.</i> , 1994 (case 4) [66] | cHL-MC   | DLBCL      | NA (DLBCL, 75%)                 | EBER-                                                                                                        | CD20+, CD45+, UCHL1-, CD15-, EBER-                                                 | NA                              | NA                                                    | NA                                                                                                         |
| Gonzales <i>et al.</i> , 1991 (case 7) [14], Kingma <i>et al.</i> , 1994 (case 6) [66] | cHL-NS   | DLBCL      | NA, equal quantity              | EBER+                                                                                                        | CD20+, CD45+, UCHL1-, CD15-, EBER+                                                 | NA                              | NA                                                    | NA                                                                                                         |
| Kingma <i>et al.</i> , 1994 (case 5) [66]                                              | cHL      | DLBCL      | NA                              | CD15+, CD20-, CD45-, UCHL1-, EBER+                                                                           | CD20+, CD45+, UCHL1-, CD15-, EBER+                                                 | NA                              | NA                                                    | NA                                                                                                         |
| Kingma <i>et al.</i> , 1994 (case 9) [66]                                              | cHL-NS   | DLBCL      | NA                              | CD15-, CD20+, CD45-, UCHL1-, EBER+                                                                           | CD20+, CD45+, UCHL1-, CD15-, EBER+                                                 | NA                              | NA                                                    | NA                                                                                                         |
| Kingma <i>et al.</i> , 1994 (case 10) [66]                                             | cHL      | DLBCL      | NA                              | CD15+, CD20+, CD45-, UCHL1-, EBER-                                                                           | CD20+, CD45+, UCHL1-, CD15-, EBER-                                                 | NA                              | NA                                                    | NA                                                                                                         |
| Kingma <i>et al.</i> , 1994 (case 11) [66]                                             | cHL      | DLBCL      | NA                              | CD15+, CD20-, CD45-, UCHL1-, EBER-                                                                           | CD20+, CD45+, UCHL1-, CD15-, EBER-                                                 | NA                              | NA                                                    | NA                                                                                                         |
| Kingma <i>et al.</i> , 1994 (case 12) [66]                                             | cHL-MC   | DLBCL      | NA                              | CD15-, CD20-, CD45-, UCHL1-, EBER+                                                                           | CD20+, CD45+, UCHL1-, CD15-, EBER-                                                 | NA                              | NA                                                    | NA                                                                                                         |
| Kingma <i>et al.</i> , 1994 (case 1*) [66]                                             | cHL-MC   | DLBCL      | Separated (synchronous)         | CD15+, CD20-, CD45-, UCHLA-, EBER-                                                                           | CD20+, CD45+, UCHL1-, CD15-, EBER-                                                 | NA                              | NA                                                    | NA                                                                                                         |
| Kingma <i>et al.</i> , 1994 (case 2*) [66]                                             | cHL      | DLBCL      | Separated (synchronous)         | CD15-, CD20-, CD45-, UCHLA-, EBER-                                                                           | CD20+, CD45+, UCHL1-, CD15-, EBER-                                                 | NA                              | NA                                                    | NA                                                                                                         |
| Nishioka <i>et al.</i> , 2018 [64]                                                     | cHL      | DLBCL      | Separated (synchronous)         | CD30+, CD15+, EBER-                                                                                          | CD20+, BCL2+, BCL6-, CD10-, CD3-, MUM1+                                            | Clonal <i>IgH</i> rearrangement | Rearrangement not confirmed (not enough DLBCL sample) | On whole tissue sample: complex karyotype t(14:18)(q32:p21), and t(14:18) ( <i>BCL2/IgH</i> translocation) |
| Zettl <i>et al.</i> , 2005 (case 1) [76]                                               | cHL-MC   | DLBCL      | Separated (synchronous)         | CD30+, CD15-, CD20-, CD79a-, $\kappa/\lambda$ light chains-, CD45-, BCL2+ (focal), EBER-, LMP1-, p53+, MUM1+ | CD20+, CD45+, CD79a+, BCL2+, BCL6-, p53-, CD10-, CD30-, CD15-, LMP1-, MUM1+        | NA                              | NA                                                    | NA                                                                                                         |
| Zettl <i>et al.</i> , 2005 (case 2) [76]                                               | cHL-MC   | DLBCL      | Separated (synchronous)         | CD30+, CD15+ (focal), CD20+ (focal), CD79a-, $\kappa/\lambda$ light chains-, CD45-, BCL2-, EBER+,            | CD20+, CD45+, CD79a+, BCL2+, BCL6-, p53-, CD10-, CD30-, CD15-, EBER-, LMP1-, MUM1+ | NA                              | NA                                                    | NA                                                                                                         |

|                                              |            |               |                            |                                                                                                                                   |                                                                                                           |                                                                                                        |                                                                                                        |                                                                           |
|----------------------------------------------|------------|---------------|----------------------------|-----------------------------------------------------------------------------------------------------------------------------------|-----------------------------------------------------------------------------------------------------------|--------------------------------------------------------------------------------------------------------|--------------------------------------------------------------------------------------------------------|---------------------------------------------------------------------------|
|                                              |            |               |                            | LMP1+, p53+,<br>MUM1+                                                                                                             |                                                                                                           |                                                                                                        |                                                                                                        |                                                                           |
| Zettl <i>et al.</i> , 2005 (case 3) [76]     | cHL-<br>MC | DLBCL         | Separated<br>(synchronous) | CD30+, CD15+,<br>CD20+ (focal),<br>CD79a-, -, $\kappa/\lambda$ light<br>chains-, CD45-,<br>BCL2+, EBER-,<br>LMP1-, p53+,<br>MUM1+ | CD20+, CD45+,<br>CD79a+, BCL2+,<br>BCL6-, p53-, CD10-,<br>CD30+ (focal), CD15-,<br>EBER-, LMP1-,<br>MUM1+ | NA                                                                                                     | NA                                                                                                     | NA                                                                        |
| Zettl <i>et al.</i> , 2005 (case 4) [76]     | cHL-<br>MC | DLBCL         | Separated<br>(synchronous) | CD30+, CD15-,<br>CD20+, CD79a-, $\kappa/\lambda$<br>light chains-, CD45-,<br>BCL2+, EBER+,<br>LMP1+, p53+,<br>MUM1+               | CD20-, CD45+,<br>CD79a+, BCL2+,<br>BCL6-, p53+, CD10-,<br>CD30-, CD15-, EBER-<br>, LMP1-, MUM1+           | NA                                                                                                     | NA                                                                                                     | NA                                                                        |
| Zettl <i>et al.</i> , 2005 (case 5) [76]     | cHL-<br>MC | DLBCL         | Separated<br>(synchronous) | CD30+, CD15-,<br>CD20-, CD45-,<br>CD79a-, BCL2+,<br>EBER-, LMP1-, p53+,<br>MUM1+                                                  | CD20+, CD45+,<br>CD79a+, BCL2+,<br>BCL6-, p53-, CD10-,<br>CD30-, CD15-, EBER-<br>, LMP1-, MUM1-           | NA                                                                                                     | NA                                                                                                     | NA                                                                        |
| Zettl <i>et al.</i> , 2005 (case 10) [76]    | cHL-<br>MC | DLBCL         | Separated<br>(synchronous) | CD30+, CD15+,<br>CD20-, CD79a-, $\kappa/\lambda$<br>light chains-, CD45-,<br>BCL2+, EBER+,<br>LMP1+, p53+,<br>MUM1+               | CD20+, CD45+,<br>CD79a+, BCL2+,<br>BCL6-, p53-, CD10-,<br>CD30-, CD15-, EBER-<br>, LMP1-, MUM1-           | NA                                                                                                     | NA                                                                                                     | NA                                                                        |
| Geladari <i>et al.</i> , 2020 [82]           | cHL        | DLBCL         | NA                         | CD30+, CD15+,<br>CD20-, PAX5+,<br>EBER+                                                                                           | CD20+, PAX5+, Ki67<br>80%                                                                                 | NA                                                                                                     | NA                                                                                                     | NA                                                                        |
| Schmitz <i>et al.</i> , 2005 (case 6) [6]    | cHL        | DLBCL         | NA                         | EBER-                                                                                                                             | EBER-                                                                                                     | Same <i>IgH</i><br>rearrangement,<br>shared and<br>distinct <i>V</i> gene<br>somatic<br>hypermutations | Same <i>IgH</i><br>rearrangement,<br>shared and<br>distinct <i>V</i> gene<br>somatic<br>hypermutations | <i>TP53</i> variant<br>identifier on the<br>DLBCL<br>contingent only      |
| Maeshima <i>et al.</i> , 2015 [3]            | cHL-<br>MC | DLBCL         | Separated<br>(synchronous) | CD30+, CD15-,<br>CD20-, PAX5+,<br>CD79a-, EBER-,<br>BOB1-, OCT2-                                                                  | CD20+, CD10+,<br>CD30+ (focal), EBER-<br>, CD5-                                                           | NA                                                                                                     | NA                                                                                                     | No <i>BCL2</i> or<br><i>MALT1</i><br>translocation in<br>both contingents |
| Aussedat <i>et al.</i> , 2020 (Com-22) [16]  | cHL-NS     | PMBL          | NA                         | CD30+, EBER-                                                                                                                      | CD20+, EBER-                                                                                              | NA                                                                                                     | NA                                                                                                     | NA                                                                        |
| Aussedat <i>et al.</i> , 2020 (Com-101) [16] | cHL-NS     | DLBCL         | NA                         | CD30+, EBER-                                                                                                                      | CD20+, EBER-,<br>CD30-                                                                                    | NA                                                                                                     | NA                                                                                                     | NA                                                                        |
| Aussedat <i>et al.</i> , 2020 (Com-158) [16] | cHL-NS     | DLBCL         | Separated<br>(synchronous) | CD30+, EBER-                                                                                                                      | CD20+, EBER-,<br>CD30-                                                                                    | NA                                                                                                     | NA                                                                                                     | NA                                                                        |
| Aussedat <i>et al.</i> , 2020 (Com-219) [16] | cHL-NS     | PMBL          | NA                         | CD30+, EBER-                                                                                                                      | CD20+, EBER-                                                                                              | NA                                                                                                     | NA                                                                                                     | NA                                                                        |
| Aussedat <i>et al.</i> , 2020 (Com-236) [16] | cHL-NS     | DLBCL         | NA                         | CD30+, EBER-                                                                                                                      | CD20+, EBER-,<br>CD30-                                                                                    | NA                                                                                                     | NA                                                                                                     | NA                                                                        |
| Aussedat <i>et al.</i> , 2020 (Com-240) [16] | cHL-NS     | PMBL          | Separated<br>(synchronous) | CD30+, EBER-                                                                                                                      | CD20+, EBER-                                                                                              | NA                                                                                                     | NA                                                                                                     | NA                                                                        |
| Aussedat <i>et al.</i> , 2020 (Com-251) [16] | cHL-LR     | PMBL          | NA                         | CD30+, EBER-                                                                                                                      | CD20+, EBER-,<br>CD30-                                                                                    | NA                                                                                                     | NA                                                                                                     | NA                                                                        |
| Aussedat <i>et al.</i> , 2020 (Com-253) [16] | cHL-NS     | GZL (group 2) | NA                         | CD30+, EBER-                                                                                                                      | CD20+, EBER-,<br>CD30+                                                                                    | NA                                                                                                     | NA                                                                                                     | NA                                                                        |
| Aussedat <i>et al.</i> , 2020 (Com-312) [16] | cHL-NS     | PMBL          | NA                         | CD30+, EBER-                                                                                                                      | CD20+, EBER-                                                                                              | NA                                                                                                     | NA                                                                                                     | NA                                                                        |
| Wilson <i>et al.</i> , 2014 [83]             | cHL-NS     | PMBL          | NA                         | NA                                                                                                                                | NA                                                                                                        | NA                                                                                                     | NA                                                                                                     | NA                                                                        |

|                                                     |        |       |                         |                                                                                                                       |                                                                             |                                                                                                           |                                                                                                       |    |
|-----------------------------------------------------|--------|-------|-------------------------|-----------------------------------------------------------------------------------------------------------------------|-----------------------------------------------------------------------------|-----------------------------------------------------------------------------------------------------------|-------------------------------------------------------------------------------------------------------|----|
| Bellan <i>et al.</i> , 2002 [84]                    | cHL-NS | DLBCL | Separated               | CD30+, CD15+, CD20-, CD79a-, CD3-, CD4-, CD5-, CD8-, EBER-, LMP1-, ALK1-, OCT2+                                       | CD20+, CD79a+, CD30+ (weak), CD15-, EBER-, LMP1-, CD3-, CD4-, CD5-, CD8-    | Common <i>Jh-Dh</i> rearrangement, different <i>Vh</i> segment rearrangement                              | Common <i>Jh-Dh</i> rearrangement, different <i>Vh</i> segment rearrangement                          | NA |
| Rosenquist <i>et al.</i> , 2004 [13]                | cHL-MC | DLBCL | NA                      | CD30+, CD15+ (focal), CD20-, EBER-, BOB1-, OCT2-                                                                      | CD20+, CD30-, CD15-, EBER-, BOB1+, OCT2+                                    | Common <i>IgK/IgH</i> rearrangement, with somatic hypermutations; Additional <i>IgK/IgH</i> rearrangement | Common <i>IgK/IgH</i> rearrangement, with somatic hypermutations (more important in DLBCL contingent) | NA |
| Wei <i>et al.</i> , 2004 [85]                       | cHL-NS | DLBCL | NA                      | CD30+, CD15+                                                                                                          | CD20+, CD30-, CD15-, CD3-                                                   | NA                                                                                                        | NA                                                                                                    | NA |
| Traverse-Glehen <i>et al.</i> , 2005 (case 22) [86] | cHL-NS | PMBL  | NA                      | CD30+ (weak), CD15+ (weak), CD20-, PAX5+, CD79a-, EBER-, BOB1-, OCT2-                                                 | CD20+, CD79a+, CD30+ (weak), CD15-, EBER-, PAX5+ (weak), BOB1+ (weak)       | NA                                                                                                        | NA                                                                                                    | NA |
| Traverse-Glehen <i>et al.</i> , 2005 (case 23) [86] | cHL-NS | PMBL  | Separated (synchronous) | CD30+ (weak), CD15+ (weak), CD20-, CD45-                                                                              | CD20+, CD45+, MAL+, PAX5+, BOB1+, OCT2+                                     | NA                                                                                                        | NA                                                                                                    | NA |
| Traverse-Glehen <i>et al.</i> , 2005 (case 24) [86] | cHL-NS | PMBL  | NA                      | MAL+, PAX5+, EBER+, OCT2-, BOB1-                                                                                      | CD20+, CD45+, MAL+, CD30-, CD15-, EBER+, PAX5+, BOB1+, OCT2+                | NA                                                                                                        | NA                                                                                                    | NA |
| Traverse-Glehen <i>et al.</i> , 2005 (case 25) [86] | cHL-NS | PMBL  | NA                      | CD30+ (weak), CD15+ (weak), CD20-, CD45-, EBER-                                                                       | CD20+, CD45+, CD30+ (weak), CD15-, EBER-                                    | NA                                                                                                        | NA                                                                                                    | NA |
| Traverse-Glehen <i>et al.</i> , 2005 (case 26) [86] | cHL-NS | PMBL  | NA                      | CD30+ (weak), CD15+ (weak), MAL-, CD20+ (weak), CD45-, PAX5+ (weak), CD79a+ (weak), EBER-, OCT2+ (weak), BOB1+ (weak) | CD20+, CD45+, MAL+, CD79a+, CD30-, CD15-, EBER-, BOB1+ (weak), OCT2+ (weak) | NA                                                                                                        | NA                                                                                                    | NA |
| Traverse-Glehen <i>et al.</i> , 2005 (case 27) [86] | cHL-NS | PMBL  | Separated (synchronous) | CD30+ (weak), CD15+ (weak), CD20-, CD79a-                                                                             | CD20+, CD30-, CD15-                                                         | NA                                                                                                        | NA                                                                                                    | NA |
| Quintanilla-Martinez <i>et al.</i> , 2009 [87]      | cHL-NS | PMBL  | NA                      | CD30+, CD15+, EBER+                                                                                                   | CD20+, MAL+, CD15-, EBER+                                                   | NA                                                                                                        | NA                                                                                                    | NA |
| Quintanilla-Martinez <i>et al.</i> , 2009 [87]      | cHL-NS | PMBL  | NA                      | CD30+, CD15+, EBER+                                                                                                   | CD20+, MAL+, CD15-, EBER+                                                   | NA                                                                                                        | NA                                                                                                    | NA |
| Quintanilla-Martinez <i>et al.</i> , 2009 [87]      | cHL-NS | PMBL  | NA                      | CD30+, CD15+, EBER+                                                                                                   | CD20+, MAL+, CD15-, EBER+                                                   | NA                                                                                                        | NA                                                                                                    | NA |
| Quintanilla-Martinez <i>et al.</i> , 2009 [87]      | cHL-NS | PMBL  | NA                      | CD30+, CD15+, EBER+                                                                                                   | CD20+, MAL+, CD15-, EBER+                                                   | NA                                                                                                        | NA                                                                                                    | NA |
| Oschlies <i>et al.</i> , 2011 [88]                  | cHL-NS | PMBL  | NA                      | NA                                                                                                                    | NA                                                                          | NA                                                                                                        | NA                                                                                                    | NA |
| Eberle <i>et al.</i> , 2011 [89]                    | cHL-NS | PMBL  | NA                      | NA                                                                                                                    | NA                                                                          | NA                                                                                                        | NA                                                                                                    | NA |
| Yu <i>et al.</i> , 2011 [90]                        | cHL-NS | DLBCL | Separated               | CD30+, CD15+, CD20-, PAX5-, CD79a-, CD10-, CD3-, CyclinD1-, BCL6-, EBER-, EMA-, MUM1+                                 | CD20+, CD45+, CD79a+, BCL6-, CD10-, EBER-, CD3-, MUM1+, PAX5+               | NA                                                                                                        | NA                                                                                                    | NA |

|                                             |        |                            |                                    |                                                                                                                                                  |                                                                                                                                                |                                                                                     |                                                                                     |                                                                              |
|---------------------------------------------|--------|----------------------------|------------------------------------|--------------------------------------------------------------------------------------------------------------------------------------------------|------------------------------------------------------------------------------------------------------------------------------------------------|-------------------------------------------------------------------------------------|-------------------------------------------------------------------------------------|------------------------------------------------------------------------------|
| Wang <i>et al.</i> , 2013 [91]              | cHL-MC | DLBCL                      | Separated (synchronous)            | CD30+, CD15+, CD20-, CD45-, PAX5+, CD79a-, CD10-, CD3-, EBER-, LMP1-, BOB1-, OCT2+, MUM1+                                                        | CD20+, CD45+, CD79a+, BCL6-, CD10-, CD30-, CD15-, EBER-, LMP1-, MUM1+, PAX+, Ki67 80%                                                          | Common <i>IgK</i> rearrangement                                                     | Common <i>IgK</i> rearrangement                                                     | NA                                                                           |
| Khan <i>et al.</i> , 2017 [92]              | cHL    | PMBL                       | NA                                 | CD30+, CD15+, PAX5+                                                                                                                              | CD20+, CD79a+, BCL2+ (weak), BCL6+ (weak), CD23+, CD10-, Ki67 70%                                                                              | NA                                                                                  | NA                                                                                  | NA                                                                           |
| Goyal <i>et al.</i> , 2016 [93]             | cHL-MC | DLBCL                      | NA                                 | CD30+, CD15-, CD20+ (weak), CD45-, PAX5+, CD10-, CD5-, CD3-, BCL6+ (weak), EBER-                                                                 | CD20+, CD45+, BCL2+ (weak, focal), BCL6+, CD10-, CD30-, CD15-, EBER-, CD3-, CD5-, MUM1-, PAX5+                                                 | Common <i>Dh-Jh</i> rearrangement and additional <i>IgH</i> rearrangement           | Common <i>Dh-Jh</i> rearrangement                                                   | No <i>BCL2</i> , <i>BCL6</i> or <i>MYC</i> translocation in both contingents |
| Khanna <i>et al.</i> , 2010 [94]            | cHL-NS | DLBCL                      | Separated (synchronous)            | EBER+                                                                                                                                            | EBER+                                                                                                                                          | Same clonal rearrangement (unspecified), different from the first DLBCL 3 years ago | Same clonal rearrangement (unspecified), different from the first DLBCL 3 years ago | NA                                                                           |
| Auditeau <i>et al.</i> , 2018 [81]          | cHL    | DLBCL and MZL              | NA                                 | CD30+, CD15+, CD20-, CD79a-, ALK1-, CD5-, CD3-                                                                                                   | CD20+ (cytometry), CD10+ (cytometry)                                                                                                           | NA                                                                                  | NA                                                                                  | NA                                                                           |
| Casey <i>et al.</i> , 1990 (case 1) [95]    | cHL-NS | DLBCL                      | NA                                 | CD15+, CD20-, CD45-, UCHL1-                                                                                                                      | CD20+, CD45+, UCHL1-, CD15-                                                                                                                    | NA                                                                                  | NA                                                                                  | NA                                                                           |
| Casey <i>et al.</i> , 1990 (case 8) [95]    | cHL-NS | DLBCL                      | Separated (synchronous)            | CD15+, CD20-, CD45+, UCHL1-                                                                                                                      | CD20-, LN1/LN2+, CD45+, UCHL1-, CD15+ (focal)                                                                                                  | NA                                                                                  | Clonal <i>IgH/IgK</i> rearrangement                                                 | NA                                                                           |
| Guarner <i>et al.</i> , 1990 [96]           | cHL-MC | DLBCL                      | Separated (synchronous)            | EBER+                                                                                                                                            | EBER+                                                                                                                                          | NA                                                                                  | NA                                                                                  | NA                                                                           |
| Huang <i>et al.</i> , 2006 [97]             | cHL-NS | DLBCL                      | Separated with a transitional zone | CD30+, CD15+ (focal), CD20-, CD45+, PAX5-, CD79a-, CD10-, CD3-, BCL2+, BCL6-, EBER+, LMP1+, MUM1+                                                | CD20+, CD45+, CD79a+, BCL2-, BCL6+, CD10-, CD3-, CD15-, EBER-, LMP1-, CD3-, MUM1-, PAX5+                                                       | Common <i>IgH</i> rearrangement                                                     | Common <i>IgH</i> rearrangement                                                     | NA                                                                           |
| Wang <i>et al.</i> , 2020 [98]              | cHL-MC | DLBCL                      | Separated (synchronous)            | CD30+, CD15+ (focal), CD20+ (weak, focal), PAX5+, MYC+ (focal), CD3-, CD5-, CD10-, BCL2+ (weak), BCL6-, EBER+ (focal), LMP+, BOB1+, OCT2-, MUM1- | CD20+, MYC+, CD79a+, BCL2+ (focal), BCL6-, CD10-, CD30+, CD15-, EBER+ (focal), LMP1+ (focal), CD3-, CD5-, MUM1+, PAX5+, BOB1+, OCT2+, Ki67 60% | Two different clonal rearrangements (unrelated)                                     | Two different clonal rearrangements (unrelated)                                     | NA                                                                           |
| Kerl <i>et al.</i> , 1999 [99]              | cHL-NS | High-grade B cell lymphoma | NA                                 | CD30+, CD15+, CD20+                                                                                                                              | CD20+, CD30-, CD15-                                                                                                                            | Two different clonal rearrangements (unrelated)                                     | Two different clonal rearrangements (unrelated)                                     | NA                                                                           |
| Perwein <i>et al.</i> , 2020 (case 4) [100] | cHL-NS | PMBL                       | Separated (synchronous)            | CD30+, CD15+, CD20+ (focal), PAX5+, CD79a-,                                                                                                      | CD20+, CD79a+, BCL6+, CD10+,                                                                                                                   | NA                                                                                  | NA                                                                                  | NA                                                                           |

|                                             |        |                            |                                       |                                                                                                      |                                                                          |                                                  |                                                  |                                                                                                      |
|---------------------------------------------|--------|----------------------------|---------------------------------------|------------------------------------------------------------------------------------------------------|--------------------------------------------------------------------------|--------------------------------------------------|--------------------------------------------------|------------------------------------------------------------------------------------------------------|
| Perwein <i>et al.</i> , 2020 (case 1) [100] | cHL-NS | DLBCL                      | NA                                    | CD10-, BCL6-, EBER-<br>CD30+, CD15+ (focal), CD20+ (focal), PAX5+, CD79a-, CD30+, CD20-, CD4-, EBER+ | CD30+ (focal), CD15-, EBER-, PAX5+<br>CD20+, CD79a-, CD30+, CD15-, PAX5+ | NA                                               | NA                                               | NA                                                                                                   |
| Miyagaki <i>et al.</i> , 2019 [101]         | cHL-NS | DLBCL                      | NA                                    | CD30+, CD15+, CD3-, CyclinD1-, UCHL1-, EMA-, CD45-                                                   | CD20+, CD30-                                                             | NA                                               | NA                                               | NA                                                                                                   |
| Paulli <i>et al.</i> , 1992 [102]           | cHL-NS | DLBCL                      | NA                                    | CD30+, CD15+, CD3-, CyclinD1-, UCHL1-, EMA-, CD45-                                                   | CD20+, CD45+, UCHL1-, CD30-, EMA-, CD15-, CD3-                           | NA                                               | NA                                               | NA                                                                                                   |
| Hwang <i>et al.</i> , 2011 [103]            | cHL-NS | DLBCL (EBV+ of the early)  | NA                                    | CD30+, CD15+, EBER+                                                                                  | CD20+, CD30-, EBER+                                                      | No clonal <i>IgH</i> or <i>IgK</i> rearrangement | No clonal <i>IgH</i> or <i>IgK</i> rearrangement | NA                                                                                                   |
| Hell <i>et al.</i> , 1995 (case 3) [104]    | cHL-NS | DLBCL                      | NA                                    | CD30+, CD15+, CD20+, CD3-                                                                            | CD20+, CD30-, CD15-, CD3-                                                | NA                                               | NA                                               | NA                                                                                                   |
| Hell <i>et al.</i> , 1995 (case 6) [104]    | cHL-NS | DLBCL                      | NA                                    | CD30+, CD15+, CD20-, CD3-                                                                            | CD20+, CD30-, CD15-, CD3-                                                | NA                                               | NA                                               | NA                                                                                                   |
| Soliman <i>et al.</i> , 2016 [105]          | cHL-MC | Burkitt lymphoma/leukemia  | Separated (synchronous)               | CD30+, CD15+, CD20-, CD45-, CD3-, LMP1+                                                              | CD20+, MYC+, CD79a+, BCL2-, BCL6+, CD10+, EBER+, CD3-, Ki67 95%          | No <i>IgH</i> rearrangement                      | <i>IgH</i> rearrangement                         | <i>IgH/MYC</i> translocation in the Burkitt contingent only; Cytogenetic analysis : t(8;14)(q24;q32) |
| Kim <i>et al.</i> , 1977 (case 18) [1]      | cHL-NS | DLBCL                      | Separated (synchronous) and composite | NA                                                                                                   | NA                                                                       | NA                                               | NA                                               | NA                                                                                                   |
| Jaffe <i>et al.</i> , 1992 (case 3) [58]    | cHL    | DLBCL                      | NA                                    | CD15+, CD20-                                                                                         | NA                                                                       | NA                                               | NA                                               | NA                                                                                                   |
| Jaffe <i>et al.</i> , 1992 (case 6) [58]    | cHL    | DLBCL                      | NA                                    | NA                                                                                                   | NA                                                                       | NA                                               | NA                                               | NA                                                                                                   |
| Jaffe <i>et al.</i> , 1992 (case 7) [58]    | cHL    | DLBCL                      | NA                                    | CD15-, CD20-                                                                                         | NA                                                                       | NA                                               | NA                                               | NA                                                                                                   |
| Jaffe <i>et al.</i> , 1992 (case 8) [58]    | cHL    | DLBCL                      | NA                                    | CD15+, CD20-                                                                                         | NA                                                                       | NA                                               | NA                                               | NA                                                                                                   |
| Jaffe <i>et al.</i> , 1992 (case 9) [58]    | cHL    | DLBCL                      | NA                                    | NA                                                                                                   | NA                                                                       | NA                                               | NA                                               | NA                                                                                                   |
| Jaffe <i>et al.</i> , 1992 (case 10) [58]   | cHL    | DLBCL (intermediate cells) | NA                                    | CD15-, CD20-                                                                                         | NA                                                                       | NA                                               | NA                                               | NA                                                                                                   |
| Jaffe <i>et al.</i> , 1992 (case 11) [58]   | cHL    | DLBCL                      | NA                                    | NA                                                                                                   | NA                                                                       | NA                                               | NA                                               | NA                                                                                                   |
| Jaffe <i>et al.</i> , 1992 (case 12) [58]   | cHL    | DLBCL                      | NA                                    | CD15+, CD20+                                                                                         | NA                                                                       | NA                                               | NA                                               | NA                                                                                                   |
| Jaffe <i>et al.</i> , 1992 (case 14) [58]   | cHL    | DLBCL                      | Separated (synchronous)               | CD15+, CD20-                                                                                         | NA                                                                       | NA                                               | NA                                               | NA                                                                                                   |
| Jaffe <i>et al.</i> , 1992 (case 15) [58]   | cHL    | DLBCL                      | Separated (synchronous)               | CD15+, CD20-                                                                                         | NA                                                                       | NA                                               | NA                                               | NA                                                                                                   |

cHL: classical Hodgkin lymphoma; DLBCL: Diffuse large B cell lymphoma; EBER: Epstein-Barr virus-encoded small RNA *in situ* hybridization; EBV: Epstein-Barr virus; GZL: Grey zone lymphoma; LR: Lymphocyte rich; MC: Mixed cellularity; MZL: Marginal zone lymphoma; NA: Not available; NS: Nodular sclerosis; PMBL: Primary mediastinal B cell lymphoma; +: positive; -: negative.

\*Case from the study of Kigma *et al.*, 1994 [65] in the synchronous/simultaneous lymphomas table. \*\*Major/predominant contingent when indicated.

Supplementary Table S10: clinical and laboratory data of cHL/NLPHL composite lymphomas.

| References                               | Age (years) | Sex | History of lymphoma                                                                        | Location                                     | Tumor size (cm) | B symptoms | Ann Arbor stage | Other symptoms or tumor mass/LN | Laboratory data | Extension assessment                           | Treatment                         | Outcome                                                                                 | Follow-up duration (months) | Time of relapse / DOD (months) |
|------------------------------------------|-------------|-----|--------------------------------------------------------------------------------------------|----------------------------------------------|-----------------|------------|-----------------|---------------------------------|-----------------|------------------------------------------------|-----------------------------------|-----------------------------------------------------------------------------------------|-----------------------------|--------------------------------|
| Song <i>et al.</i> , 2011 [106]          | 24          | M   | Family history of cHL (father and two paternal cousins) and myeloid leukemia (grandfather) | Post-auricular parotid gland and thymic mass | 3 and 2         | Yes        | VI B            | No                              | NA              | PET-scan : hypermetabolism of thymic mass; BM- | NA                                | NA                                                                                      | NA                          | NA                             |
| Szczepanowski <i>et al.</i> , 2013 [107] | 48          | M   | No                                                                                         | Cervical, supraclavicular, axillary LN       | NA              | No         | III A           | No                              | NA              | CT-scan: involvement of spleen and liver; BM-  | ABVD x4 + RT, and then BEACOPP x4 | Partial remission to the first chemotherapy and then complete remission after 10 months | 12                          | NA                             |
| Gelb <i>et al.</i> , 1993 (case 5) [108] | 22          | M   | NA                                                                                         | Submandibular LN                             | NA              | No         | I A             | No                              | NA              | NA                                             | RT                                | Complete remission                                                                      | NA                          | NA                             |

BM+/-: Involvement or not on bone marrow biopsy; cHL: classical Hodgkin lymphoma; CT-scan: computed tomography-scan; LN: Lymph node(s); M: Male; NA: Not available; NLPHL: Nodular lymphocyte predominant Hodgkin lymphoma; PET-scan: Positron emission tomography-scan; RT: Radiotherapy. For chemotherapy abbreviations, please see **Supplementary Text S1**.

**Supplementary Table S11: histopathological and molecular data of cHL/NLPHL composite lymphomas.**

| References                               | cHL type | NLPHL | Separated / mixed contingents | Immunophenotype cHL                                                                           | Immunophenotype MZL                                                                 | Clonal B rearrangements (cHL)                                                     | Clonal B rearrangements (NLPHL)                                                                                           |
|------------------------------------------|----------|-------|-------------------------------|-----------------------------------------------------------------------------------------------|-------------------------------------------------------------------------------------|-----------------------------------------------------------------------------------|---------------------------------------------------------------------------------------------------------------------------|
| Song <i>et al.</i> , 2011 [106]          | CHL-NS   | NLPHL | Separated (synchronous)       | CD30+, CD15+, CD20-, PAX5+, IgD-, p53+, BCL6-, EBER-, EMA-, OCT2-                             | CD20+, BCL6+, p53+, CD30+ (weak), CD15-, EBER-, EMA-, PAX5+, OCT2+, IgD-            | Polyclonal <i>IgH</i> rearrangements, common <i>IgK</i> rearrangement             | Polyclonal <i>IgH</i> rearrangements, common <i>IgK</i> rearrangement                                                     |
| Szczepanowski <i>et al.</i> , 2013 [107] | CHL-MC   | NLPHL | Separated                     | CD30+, CD15+, CD20+ (focal/weak), PAX5+, CD79a-, CD45-BCL6-, EBV+, LMP1+, BOB1-, OCT2+, MUM1+ | CD20+, CD45+, CD79a+, BCL6+, CD30-, CD15-, EBER-, LMP1-, MUM1+, PAX5+, BOB1+, OCT2+ | Common <i>IgH</i> rearrangement<br>Common somatic hypermutations of <i>V</i> gene | Common <i>IgH</i> rearrangement and second non shared <i>IgH</i> allele<br>Common somatic hypermutations of <i>V</i> gene |
| Gelb <i>et al.</i> , 1993 (case 5) [108] | CHL-MC*  | NLPHL | Separated                     | CD30+, CD15+                                                                                  | CD45-, CD30-, CD15-                                                                 | NA                                                                                | NA                                                                                                                        |

cHL: classical Hodgkin lymphoma; EBER: Epstein-Barr virus-encoded small RNA *in situ* hybridization; MC: Mixed cellularity; NA: Not available; NLPHL: Nodular lymphocyte predominant Hodgkin lymphoma; NS: Nodular sclerosis; +: positive; -: negative.

\*Predominant contingent.

Supplementary Table S12: Clinical and laboratory data of cHL/T-cell composite lymphomas.

| References                                   | Age (years) | Sex | History of lymphoma                   | Location                                                                            | Tumor size (cm) | B symptoms | Ann Arbor stage | Other symptoms or tumor mass/LN | Laboratory data                             | Extension assessment                                                                                                            | Treatment                                                             | Outcome                                                 | Follow-up duration (months) | Time of relapse / DOD (months) |
|----------------------------------------------|-------------|-----|---------------------------------------|-------------------------------------------------------------------------------------|-----------------|------------|-----------------|---------------------------------|---------------------------------------------|---------------------------------------------------------------------------------------------------------------------------------|-----------------------------------------------------------------------|---------------------------------------------------------|-----------------------------|--------------------------------|
| Ichikawa <i>et al.</i> , 2017 (case 1) [109] | 76          | F   | No                                    | NA                                                                                  | NA              | NA         | IV A            | NA                              | NA                                          | NA                                                                                                                              | NA                                                                    | NA                                                      | NA                          | NA                             |
| Ichikawa <i>et al.</i> , 2017 (case 2) [109] | 19          | M   | HL (2010)                             | NA                                                                                  | NA              | NA         | II A            | NA                              | NA                                          | NA                                                                                                                              | ICE, LEED, Auto-PBSCT                                                 | Complete remission, alive                               | 48                          | NA                             |
| Ichikawa <i>et al.</i> , 2017 (case 3) [109] | 74          | M   | No                                    | NA                                                                                  | NA              | NA         | III A           | NA                              | NA                                          | NA                                                                                                                              | ABVD                                                                  | Complete remission, alive                               | 36                          | NA                             |
| Ichikawa <i>et al.</i> , 2017 (case 4) [109] | 43          | M   | No                                    | NA                                                                                  | NA              | NA         | I A             | NA                              | NA                                          | NA                                                                                                                              | ABVD                                                                  | Complete remission, alive                               | 24                          | NA                             |
| Ichikawa <i>et al.</i> , 2017 (case 5) [109] | 57          | F   | T-cell prolymphocytic leukemia (2002) | NA                                                                                  | NA              | NA         | IV A            | NA                              | Atypical lymphocytes in peripheral blood    | NA                                                                                                                              | ABVD                                                                  | Partial remission, dead at Sep/2015                     | NA                          | NA                             |
| Gualco <i>et al.</i> , 2009 [110]            | 55          | F   | No                                    | Cervical LN and mediastinal                                                         | NA              | Yes        | II B            | NA                              | Anemia, LDH and β2-microglobulin increase   | CT-scan: mediastinal lymphadenopathy                                                                                            | NA                                                                    | NA                                                      | NA                          | NA                             |
| Sanchez <i>et al.</i> , 2006 [11]            | 65          | M   | No                                    | Cervical, axillary, right groin, iliac, and splenomegaly and liver involvement      | 2,1             | Yes        | NA              | Dysuria                         | Normal blood cell count and chemistry panel | CT-scan: extensive lymphadenopathy throughout the abdomen and pelvis, splenomegaly                                              | Cyclophosphamide, prednisone and then C-MOPP                          | Dead of sepsis and hepatic encephalopathy after 3 weeks | 0.75                        | 0.75                           |
| Brown <i>et al.</i> , 2004 [112]             | 60          | M   | No                                    | Cervical LN                                                                         | NA              | No         | IV A            | Fever and night sweats          | NA                                          | BM+: PTCL (20-30% involved)                                                                                                     | CHOP x4 at first, then ESHAP, and then autologous-PBSCT after relapse | NA                                                      | NA                          | NA                             |
| Wlodarska <i>et al.</i> , 1993 [113]         | 54          | M   | HL 3 years earlier                    | Cervical, axillary, mediastinal, retroperitoneal LN                                 | NA              | Yes        | NA              | Arthritis                       | NA                                          | BM-                                                                                                                             | NA                                                                    | NA                                                      | NA                          | NA                             |
| Gui <i>et al.</i> , 2020 [114]               | 44          | M   | No                                    | Bilateral axillary, cervical, inguinal, mediastinal, parailliac, retroperitoneal LN | 4               | No         | IV A            | NA                              | LDH and β2-microglobulin in normal range    | PET-scan: bilateral axillary, cervical, inguinal, mediastinal and parailliac, retroperitoneal LN<br>BM+: T-cell lymphoma (3,5%) | ABVD x1, chidamide, followed by GDP x1                                | Partial remission                                       | NA                          | NA                             |
| Demurtas <i>et al.</i> , 2011 (case 17) [60] | 84          | M   | No                                    | Axillary LN                                                                         | NA              | NA         | NA              | NA                              | NA                                          | NA                                                                                                                              | NA                                                                    | NA                                                      | Loss to follow-up           | Loss to follow-up              |

BM+/-: Involvement or not on bone marrow biopsy; cHL: classical Hodgkin lymphoma; CT-scan: computed tomography-scan; F: Female; LDH: Lactate dehydrogenase; LN: Lymph node(s); M: Male; MF: Mycosis fungoid; NA: Not available; PET-scan: Positron emission tomography-scan; PTCL: Peripheral T-cell lymphoma; RT: Radiotherapy. For chemotherapy abbreviations, please see **Supplementary Text S1**.



**Supplementary Table S13: histopathological and molecular data of cHL/T-cell composite lymphomas.**

| References                                   | cHL type | T-cell lymphoma type           | Separated / mixed contingents | Immunophenotype cHL                            | Immunophenotype T-cell lymphoma                                                                                       | Clonal B rearrangements (cHL)      | Clonal T rearrangements (T-cell lymphoma)     | Other molecular alterations                                                                                                                                                                                                         |
|----------------------------------------------|----------|--------------------------------|-------------------------------|------------------------------------------------|-----------------------------------------------------------------------------------------------------------------------|------------------------------------|-----------------------------------------------|-------------------------------------------------------------------------------------------------------------------------------------------------------------------------------------------------------------------------------------|
| Ichikawa <i>et al.</i> , 2017 (case 1) [109] | cHL-MC   | PTCL                           | NA                            | CD30+, CD15-, CD20-, PAX5+, EBER-              | CD3+, CD4-, CD8+, TIA1+, Granzyme B-, EBER-                                                                           | NA                                 | NA                                            | On whole tissue sample: clonal rearrangements of <i>IgH</i> and TCR $\gamma$                                                                                                                                                        |
| Ichikawa <i>et al.</i> , 2017 (case 2) [109] | cHL-MC   | PTCL                           | NA                            | CD30+, CD15-, CD20+, PAX5+, EBER-              | CD3+, CD4-, CD8+, TIA1+, Granzyme B-, FOXP3-, EBER-                                                                   | NA                                 | NA                                            | On whole tissue sample: clonal rearrangements of <i>IgH</i> and TCR $\gamma$                                                                                                                                                        |
| Ichikawa <i>et al.</i> , 2017 (case 3) [109] | cHL-MC   | PTCL                           | NA                            | CD30+, CD15+, CD20-, PAX5+, EBER-              | CD3+, CD4+, CD8-, TIA1-, Granzyme B-, FOXP3+, EBER-                                                                   | NA                                 | NA                                            | On whole tissue sample: clonal rearrangements of <i>IgH</i> and TCR $\gamma$                                                                                                                                                        |
| Ichikawa <i>et al.</i> , 2017 (case 4) [109] | cHL-MC   | T-cell prolymphocytic leukemia | NA                            | CD30+, CD15+, CD20-, PAX5+, EBER-              | CD3+, CD4-, CD8+, TIA1+, Granzyme B-, EBER-                                                                           | NA                                 | NA                                            | On whole tissue sample: clonal rearrangements of <i>IgH</i> and TCR $\gamma$                                                                                                                                                        |
| Ichikawa <i>et al.</i> , 2017 (case 5) [109] | cHL-MC   | T-cell prolymphocytic leukemia | NA                            | CD30+, CD15+, CD20-, PAX5+, EBER-              | CD3+, CD4-, CD8+, TIA1+, Granzyme B-, EBER-                                                                           | NA                                 | NA                                            | On whole tissue sample: clonal rearrangements of <i>IgH</i> and TCR $\gamma$                                                                                                                                                        |
| Gualco <i>et al.</i> , 2009 [110]            | cHL      | PTCL                           | NA                            | CD30+, CD15+, CD20-, EBER+, LMP1+, CD3-, CD45- | CD30-, CD15-, CD3+, CD4+, CD8-, CD56-, Ki67: 80%                                                                      | Clonal <i>IgH</i> rearrangement    | Clonal TCR $\gamma$ and $\beta$ rearrangement | NA                                                                                                                                                                                                                                  |
| Sanchez <i>et al.</i> , 2006 [111]           | cHL      | PTCL                           | NA                            | CD30+, CD15+, CD20-, EBER+, CD45-, ALK1-       | CD3+, CD5-                                                                                                            | NA                                 | NA                                            | On whole tissue sample: TCR $\gamma$ rearrangement : same rearrangements on both sites with both composite lymphomas No <i>IgH</i> rearrangement Similar clonal TCR $\gamma$ rearrangement in both site involved by T-cell lymphoma |
| Brown <i>et al.</i> , 2004 [112]             | cHL-NS   | PTCL                           | Separated (synchronous)       | CD30+, CD15+, CD20-, EBER-, CD3-, CD45-        | CD30-, CD15-, CD3+, CD5+, CD7-, CD45+, CD10-                                                                          | NA                                 | NA                                            | On whole tissue sample: TCR $\gamma$ and $\beta$ rearrangements                                                                                                                                                                     |
| Wlodarska <i>et al.</i> , 1993 [113]         | cHL      | PTCL                           | Mixed                         | CD30+, CD15+, CD20+, CD3-, CD4-, CD5-, CD8-    | CD30-, CD15-, CD3+, CD4+, CD5+, CD8-, CD45+                                                                           | NA                                 | NA                                            | On whole tissue sample: TCR $\beta$ and $\delta$ rearrangements                                                                                                                                                                     |
| Gui <i>et al.</i> , 2020 [114]               | cHL      | Cytotoxic CD8+ T-cell lymphoma | NA                            | CD30+, CD15+, PAX5+, MUM1+, EBER+, Ki67: 60%   | CD30-, CD20-, CD2+, CD3+, CD4+ (weak), CD5+, CD7+, CD8+, TIA1+, Granzyme B-, , CD10-, CXCL13-, PD1+, CD56-, Ki67: 40% | NA                                 | NA                                            | On whole tissue sample: TCR $\beta$ and $\delta$ rearrangements                                                                                                                                                                     |
| Demurtas <i>et al.</i> , 2011 (case 17) [60] | cHL      | PTCL                           | NA                            | NA                                             | CD2+, CD3+, CD5-, CD7-, CD8+                                                                                          | No clonal <i>IgH</i> rearrangement | Clonal TCR $\gamma$ rearrangement             | NA                                                                                                                                                                                                                                  |

cHL: classical Hodgkin lymphoma; MC: Mixed cellularity; NS: Nodular sclerosis; EBER: Epstein-Barr virus-encoded small RNA *in situ* hybridization; NA: Not available; PTCL: Peripheral T cell lymphoma; +: positive; -: negative.
